## 1 Functional characterization of genes mediating cell wall metabolism and responses to plant cell 2 wall integrity impairment 3

4 Timo Engelsdorf<sup>1, 2</sup>, Lars Kjaer<sup>3, 4</sup>, Nora Gigli-Bisceglia<sup>1, 5</sup>, Lauri Vaahtera<sup>1</sup>, Stefan Bauer<sup>6, 7</sup>, Eva  
5 Miedes<sup>8, 9</sup>, Alexandra Wormit<sup>3, 10</sup>, Lucinda James<sup>3, 11</sup>, Issariya Chairam<sup>3, 11</sup>, Antonio Molina<sup>8, 9</sup> and  
6 Thorsten Hamann<sup>1, 3\*</sup>

7 <sup>1</sup>Institute for Biology, Faculty of Natural Sciences, Norwegian University of Science and Technology,  
8 5 Høgskoleringen, Trondheim, 7491, Norway.

9 <sup>2</sup>Present address: Division of Plant Physiology, Department of Biology, Philipps University of Marburg,  
10 35043 Marburg, Germany.

11 <sup>3</sup>Division of Cell and Molecular Biology, Department of Life Sciences, Imperial College London, Sir  
12 Alexander Fleming Building, South Kensington Campus, London, SW72AZ, UK.

13 <sup>4</sup>Present address: Sjælland erhvervsakademi, Breddahlsvej 1b, 4200 Slagelse, Zealand, Denmark

14 <sup>5</sup>Present address: Laboratory of Plant Physiology, 6708PB Wageningen University and Research,  
15 Wageningen, the Netherlands.

16 <sup>6</sup>Energy Biosciences Institute, University of California, 120A Energy Biosciences Building, 2151  
17 Berkeley Way, MC 5230, Berkeley, CA 94720-5230

18 <sup>7</sup>Present address: Zymergen, Inc. 5980 Horton St, Suite 105 Emeryville, CA 94608, USA

19 <sup>8</sup>Centro de Biotecnología y Genómica de Plantas, Universidad Politécnica de Madrid (UPM)- Instituto  
20 Nacional de Investigación y Tecnología Agraria y Alimentaria (INIA), Campus de Montegancedo-  
21 UPM, 28223 Pozuelo de Alarcón, Madrid, Spain.

22 <sup>9</sup>Departamento de Biotecnología-Biología Vegetal, Escuela Técnica Superior de Ingeniería  
23 Agronómica, Alimentaria y de Biosistemas, Universidad Politécnica de Madrid (UPM), 28040 Madrid,  
24 Spain.

25 <sup>10</sup>Present address: RWTH Aachen, Institute for Biology I, Worringerweg 3, D-52056 Aachen, Germany.

26 <sup>11</sup>Present address: ADAS, Battlegate Road, Boxworth, Cambridge, CB23 4NN, UK.

27 <sup>12</sup>Present address: Department of Nuclear Safety and Security, International Atomic Energy Agency,  
28 Vienna International Centre, PO Box 100, 1400 Vienna, Austria.

29 \* For correspondence: Tel. +47 91825937 E-mail: Thorsten.hamann@ntnu.no  
30

### 31 Funding

32 This work was supported through Gatsby AdHoc funds and a grant from the Peder Sather Center for  
33 Advanced Study to T.H. and Chris Somerville. L.K. was supported by a Ph.D. Fellowship from the  
34 Porter Institute at Imperial College and I.C. by a PhD fellowship provided by the Royal Thai  
35 government. L.D. and A.W. were supported through postdoctoral fellowships provided by the Porter  
36 Institute at Imperial College. T.E. was supported through a EU Marie Curie Fellowship  
37 “SUGAROSMO-SIGNALLING” and a DFG postdoctoral fellowship (EN 1071/1-1). N.G. was  
38 supported through the EEA project grant CYTOWALL. Research by A.M. was supported by Spanish  
39 Ministry of Economy and Competitiveness (MINECO) grant BIO2015-64077-R.  
40

### 41 Abstract

42 Plant cell walls participate in all plant-environment interactions. Maintaining cell wall integrity (CWI)  
43 during these interactions is essential. This realization led to increased interest in CWI and resulted in  
44 knowledge regarding early perception and signalling mechanisms active during CWI maintenance. By  
45 contrast, knowledge regarding processes mediating changes in cell wall metabolism upon CWI  
46 impairment is very limited. To identify genes involved and to investigate their contributions to the  
47 processes we selected 23 genes with altered expression in response to CWI impairment and  
48 characterized the impact of T-DNA insertions in these genes on cell wall composition using Fourier-  
49 Transform Infrared Spectroscopy (FTIR) in *Arabidopsis thaliana* seedlings. Insertions in 14 genes led  
50 to cell wall phenotypes detectable by FTIR. A detailed analysis of four genes found that their altered  
51 expression upon CWI impairment is dependent on THE1 activity, a key component of CWI  
52 maintenance. Phenotypic characterizations of insertion lines suggest that the four genes are required for  
53 particular aspects of CWI maintenance, cell wall composition or resistance to *Plectosphaerella*  
54 *cucumerina* infection in adult plants. Taken together, the results implicate the genes in responses to CWI  
55 impairment, cell wall metabolism and/or pathogen defence, thus identifying new molecular components  
56 and processes relevant for CWI maintenance.

57 **Keywords:** Cell wall, cell wall integrity, cell wall metabolism, cell wall signalling, plant pathogen-  
58 interaction.

59

60 **Acknowledgments**

61 Programming support from Ane-Kjersti Vie and help with lignin and phytohormone quantification from  
62 Trude Johansen and the PROMEC facility at NTNU are gratefully acknowledged.

63

## 88 **Introduction**

89 Plant cell walls are involved in all interactions between plants and their environment.  
90 Examples include pathogen infection or exposure to drought, where wall composition and  
91 structure change to prevent water loss, pathogen susceptibility or at least limit further pathogen  
92 spread (Bacete et al., 2018; Novaković et al., 2018). These changes of the walls are exemplified  
93 by reinforcement with callose during infection or modifications of pectic polysaccharides to  
94 prevent water loss during exposure to drought stress (Chowdhury et al., 2016; Dinakar &  
95 Bartels, 2013). Cell walls are extremely plastic, undergoing dynamic changes to enable plant  
96 cells to expand and differentiate during growth and development (Bidhendi & Geitmann, 2015).  
97 Controlled deposition of cellulose microfibrils through interactions between cellulose synthases  
98 and microtubules during cell expansion exemplify the changes in cell wall organization,  
99 permitting tightly controlled cell expansion (Gutierrez et al., 2009; Paredez et al., 2006).  
100 Deposition of suberin and lignin during formation of the casparian strip in pericycle cells of the  
101 primary root exemplifies modifications of cell walls during cell differentiation (Barbosa et al.,  
102 2019; Doblás et al., 2017; Lee et al., 2013). These examples illustrate processes active during  
103 plant-environment interactions and development, enabling cell walls to fulfill their respective  
104 biological functions.

105 How do cell walls perform these various functions, which sometimes involve opposite  
106 performance requirements, while simultaneously maintaining their functional integrity? The  
107 available evidence supports the existence of a dedicated mechanism, which is monitoring the  
108 functional integrity of the plant cell wall and initiates adaptive changes in cellular and cell wall  
109 metabolism to maintain cell wall integrity (CWI) (De Lorenzo et al., 2018; Doblás et al., 2018;  
110 Hamann, 2015; Kieber & Polko, 2019; Wolf, 2017). Studies of the mode of action of the CWI  
111 maintenance mechanism often investigate the responses to cell wall damage (CWD), which can  
112 be generated by cell wall degrading enzymes (cellulase, pectinase etc.) or compounds like  
113 isoxaben (ISX) (Engelsdorf et al., 2018). ISX inhibits specifically cellulose production during

114 primary cell wall formation in elongating plant cells (Heim et al., 1990; Scheible et al., 2001;  
115 Tateno, Brabham, & DeBolt, 2016). Established responses to CWD include growth inhibition  
116 involving cell cycle arrest, changes in the levels of phytohormones like jasmonic acid (JA),  
117 salicylic acid (SA) and cytokinins (CKs) as well as changes in cell wall composition involving  
118 pectic polysaccharides, lignin and callose deposition (Cano-Delgado et al., 2003; Denness et  
119 al., 2011; Ellis & Turner, 2001; Gigli-Bisceglia et al., 2018; Manfield et al., 2004).

120 The available evidence implicates receptor-like kinases (RLK) like MALE DISCOVERER  
121 1-INTERACTING RECEPTOR LIKE KINASE 2 (MIK2), FEI1, FEI2, THESEUS 1 (THE1)  
122 and FERONIA (FER) in CWI maintenance (Engelsdorf et al., 2018; Feng et al., 2018; Hematy  
123 et al., 2007; Van der Does et al., 2017; Xu et al., 2008). THE1 and FER belong to the  
124 *Catharanthus roseus* RLK1-like kinase (*CrRLK1L*) family, which has 17 members. These  
125 RLKs consist of an intracellular Serine / Threonine-kinase domain, a transmembrane domain  
126 and an extracellular domain exhibiting similarity to the malectin domain originally identified  
127 in *Xenopus laevis* (Franck et al., 2018). Currently it is not clear if malectin domains in  
128 *CrRLK1Ls* are either required for binding to cell wall epitopes, mediate protein-protein  
129 interaction or actually do both (Du et al., 2018; Feng et al., 2018; Gonneau et al., 2018; Haruta  
130 et al., 2018; Moussu et al., 2018; Stegmann et al., 2017). FER is required during gametophytic  
131 and root hair development, salt stress, JA signaling and coordination between abscisic acid-  
132 (ABA) and JA-based signaling processes (Duan et al., 2010; Escobar-Restrepo et al., 2007;  
133 Feng et al., 2018; Guo et al., 2018; Kanaoka & Torii, 2010; Shih et al., 2014; Yu et al., 2012;  
134 Zhao et al., 2018). MIK2 and THE1 are required for root development, CWD-induced lignin  
135 and phytohormone production as well as resistance to the root pathogen *Fusarium oxysporum*  
136 (Engelsdorf et al., 2018; Gonneau et al., 2018; Hematy et al., 2007; Van der Does et al., 2017).  
137 FEI1 and FEI2 have been originally identified through their impact on seedling root growth on  
138 medium containing 4.5% sucrose and subsequently implicated in a cell wall signaling pathway  
139 involving the SALT OVERLY SENSITIVE5 (SOS5) and FEI2 (Harpaz-Saad et al., 2011; Shi

140 et al., 2003; Xue et al., 2017). In parallel, ion-channels, like MID1-COMPLEMENTING  
141 ACTIVITY 1 (MCA1) and MECHANOSENSITIVE CHANNEL OF SMALL  
142 CONDUCTANCE-LIKE 2 (MSL2) and 3 (MSL3) were shown to contribute to activation of  
143 CWD-induced responses in plants (Denness et al., 2011; Engelsdorf et al., 2018). MCA1 was  
144 originally identified through its' ability to partially complement a MID1/CCH1- deficient  
145 *Saccharomyces cerevisiae* strain (Nakagawa et al., 2007). In yeast MID1/CCH1 form a  
146 plasmamembrane-localized stretch-activated calcium channel required both for mechano-  
147 perception and CWI maintenance (Levin, 2011). CWD-induced responses in plants (like in  
148 yeast cells) seem also to be sensitive to turgor manipulation (Hamann, 2015; Levin, 2011). The  
149 reason being that in *Arabidopsis thaliana* seedlings, exposed simultaneously to ISX and mild  
150 hyperosmotic conditions, most of the CWD-induced responses are suppressed in a  
151 concentration dependent manner (Engelsdorf et al., 2018; Hamann et al., 2009). The early  
152 signals generated seem to be conveyed to downstream response mediators through changes in  
153 production of reactive oxygen species (ROS) and phytohormones (JA/SA/CKs) (Denness et al.,  
154 2011; Gigli-Bisceglia et al., 2018). Enzymes implicated in ROS production upon CWI  
155 impairment are NADPH-oxidases like RESPIRATORY BURST OXIDASE HOMOLOGUE  
156 (RBOH) D/F (after ISX-treatment) or RBOH H/J during pollen tube development (Jiménez-  
157 Quesada et al., 2016). NADPH-oxidase activity in turn can be regulated via calcium binding,  
158 differential phosphorylation involving kinases controlled by changes in calcium levels  
159 (CALCINEURIN INTERACTING KINASE 26, CIPK26), activated in response to pathogen  
160 infection through phosphorylation involving BOTRYTIS INDUCED KINASE 1 (BIK1) or  
161 controlled via RHO GTPases, a ROPGEF and FER (Duan et al., 2010; Han et al., 2018; Kadota  
162 et al., 2014).

163 This abbreviated overview of molecular components active during plant CWI maintenance  
164 illustrates the increase in knowledge regarding putative CWI sensors and early signal  
165 transduction elements in recent years. Whilst it is fascinating to know about early CWD

166 perception and signaling processes we also need to understand how signals generated lead to  
167 changes in cell wall composition and structure to dissect the mode of action of the CWI  
168 maintenance mechanism thoroughly. This is of particular interest in the context of targeted  
169 modification of biomass quality and improvement of food crop performance since the CWI  
170 maintenance mechanism seems to be an important component of cell wall plasticity (Doblin et  
171 al., 2014; Mahon & Mansfield, 2019). Cell wall plasticity in turn has been discussed as the root  
172 cause for the apparently limited success of efforts aimed at optimizing biomass quality that  
173 have been achieved so far (Doblin et al., 2014).

174 We wanted to identify additional components and molecular processes, which are  
175 mediating responses to CWD and adaptive changes in cell wall metabolism. To achieve these  
176 aims we selected candidate genes using microarray-based expression profiling data deriving  
177 from ISX-treated *Arabidopsis* seedlings. Fourier Transform Infrared (FTIR) Spectroscopy was  
178 then used to identify candidate genes where insertions lead to cell wall changes on the seedling  
179 level. We performed in depth studies for four genes to validate the approach. These studies  
180 involved confirming that gene expression is responsive to ISX, determining if expression is  
181 controlled by THE1 and investigating how loss of function alleles for these genes affect cell  
182 wall composition in adult plants, resistance to the necrotrophic pathogen *Plectosphaerella*  
183 *cucumerina* and responses to ISX-induced CWD impairing CWI.

## 184 **Materials and Methods**

### 185 *Reagents*

186 All chemicals and enzymes were purchased from Sigma-Aldrich unless stated otherwise.

187

### 188 *Plant Material*

189 Wild-type and mutant *Arabidopsis thaliana* lines used in this study were ordered from  
190 the Nottingham Arabidopsis Stock Centre (<http://arabidopsis.info/>). Detailed information is  
191 listed in Supplemental Table S1. Seedlings were grown for 6 days in liquid culture (2.1 g/L  
192 Murashige and Skoog Basal Medium, 0.5 g/L MES salt and 1 % sucrose at pH 5.7) before  
193 treatment with 600 nM isoxaben (in DMSO) as described (Engelsdorf et al., 2018). For cell  
194 wall analysis, plants were grown on soil (Pro-Mix HP) in long-day conditions (16 h light, 11000  
195 Lux, 22°C; 8 h dark, 20 °C; 70 % relative humidity). For pathogen infection assays, plants were  
196 grown in phytochambers on sterile soil-vermiculite (3:1) under short-day conditions (10 h of  
197 light/14 h of dark) at 20-21 °C.

198

### 199 *Pathogen Infection Assays*

200 For *Plectosphaerella cucumerina* BMM (*PcBMM*) pathogenicity assays, 18 days-old  
201 plants (n >15) were sprayed with a spore suspension (4 x 10<sup>6</sup> spores/ml) of the fungus as  
202 previously described (Delgado-Cerezo et al., 2011; Sanchez-Vallet et al., 2010). Fungal  
203 biomass *in planta* was quantified by determining the level of the *PcBMM*  $\beta$ -tubulin gene by  
204 qPCR (forward primer: CAAGTATGTTCCCCGAGCCGT and reverse primer:  
205 GGTCCCTTCGGTCAGCTCTTC) and normalizing these values to those of *UBIQUITIN-*  
206 *CONJUGATING ENZYME21* (*UBC21*, *AT5G25760*).

207

208

209

210 *Quantitative RT-PCR*

211 Total RNA was isolated using a Spectrum Plant Total RNA Kit (Sigma-Aldrich). Two  
212 micrograms of total RNA were treated with RQ1 RNase-Free DNase (Promega) and processed  
213 with the ImProm-II Reverse Transcription System (Promega) for cDNA synthesis. qRT-PCR  
214 was performed with a Roche LightCycler 480 system using LightCycler 480 SYBR Green I  
215 Master. Gene expression levels were determined as described (Gigli-Bisceglia et al., 2018). The  
216 following gene-specific primers have been used for time course expression analysis in Col-0:

217 *ACT2-FOR* (5'-CTTGCACCAAGCAGCATGAA-3'),

218 *ACT2-REV* (5'-CCGATCCAGACACTGTACTTCCTT-3'),

219 *WSR1-FOR* (5'-TATGGTGATGAACTTTGCGTTC-3'),

220 *WSR1-REV* (5'-ACTCAACAGTAGCATCTCCTGA-3'),

221 *WSR1A-FOR* (5'-TACGCTGCTACTGGTCAACG-3'),

222 *WSR1A-REV* (5'-TTCCTCCAATCACCGGCATC-3'),

223 *WSR2-FOR* (5'-CTCACTTCCATCGTTTCAAGTG-3'),

224 *WSR2-REV* (5'-GAAACCAAACGTGGCCTAAA-3'),

225 *WSR3-FOR* (5'-GAAAGCACGAGACTGGAACG-3'),

226 *WSR3-REV* (5'-TATCCACCCTCCAACGCAA-3'),

227 *WSR4-FOR* (5'-AGCCCTGAGAGATCAAGCATT-3'),

228 *WSR4-REV* (5'-AGCTCAACTAAGCGATGAAGC-3').

229 For the characterization of T-DNA insertion lines, the following primers have been employed:

230 *ACT2-FOR*, *ACT2-REV*, *WSR1-FOR*, *WSR1-REV*, *WSR2-FOR*, *WSR2-REV*, *WSR3-FOR2* (5'-  
231 TCTTATCCGGTTGCGGAAGG-3'),

232 *WSR3-REV2* (5'-GTGGTGAGATGACCCAGAGC-3'),

233 *WSR4-FOR2* (5'-CTTGATGCAGTTGTGAAAGCA-3'),

234 *WSR4-REV2* (5'-TCTTCACCGAAACAATCATCC-3').

235



236 *FTIR Spectroscopy and Analysis*

237 For FTIR analysis, 4 biological replicates per genotype and 5 technical replicates per  
238 biological replicate were collected (i.e. for each genotype 20 spectra were collected). Spectra  
239 for each technical replicate were measured from 800 to 5000  $\text{cm}^{-1}$  with 15 accumulations per  
240 measurement on a Bruker Vertex 70. All spectra were measured at 10 kHz, with a 10 kHz  
241 lowpass filter and the Fourier transform was carried out using Blackman-Harris 3-term.  
242 Atmospheric compensation was carried out on the data using OPUS version 5  
243 ([www.bruker.com](http://www.bruker.com)). The spectra were cropped to the area between 802  $\text{cm}^{-1}$  to 1820  $\text{cm}^{-1}$  to  
244 cover informative wavenumbers as described in (Mouille et al., 2003). Linear regression was  
245 carried out based on the first ten points in either end of the spectra and used for baseline  
246 correction. The data was normalized to sum 1 with any negative values still present set to 0 for  
247 normalization purposes. Biological variation in the Col-0 controls was determined based on  
248 three independent experiments carried out with 4 biological replicates and 5 technical replicates  
249 per biological replicate (i.e. 20 spectra per experiment). The difference between the insertion  
250 lines and Col-0 was calculated by averaging all the technical repeats for a line and subtracting  
251 the corresponding average from Col-0. The difference between the insertion lines and Col-0  
252 was plotted by wavelength. Two times the standard deviation of Col-0 was chosen as a cutoff  
253 as it would indicate significance if the natural variation is assumed to be symmetrical across  
254 Col-0 and the insertion line.

255

256 *Cell Wall Analysis*

257 Cell wall preparation and analysis were performed as described (Yeats et al., 2016) with  
258 minor modifications. For analysis of stem cell wall composition, major stems of three plants  
259 per genotype were pooled to form one biological replicate. For analysis of leaf cell wall  
260 composition, whole leaf rosettes of three plants per genotype were pooled to form one  
261 biological replicate. Four biological replicates were analysed in all cases. Plant samples were

262 immediately flash-frozen in liquid nitrogen after sampling and lyophilized. Dried material was  
263 ball-milled with zirconia beads in a Labman robot ([www.labmanautomation.com](http://www.labmanautomation.com)), extracted  
264 three times with 70 % ethanol at 70°C and dried under vacuum. Starch was removed using a  
265 Megazyme Total Starch Kit according to the manufacturer's instructions. After drying under  
266 vacuum, de-starched alcohol insoluble residue (AIR) was weighed out in 2 ml screw caps tubes  
267 for cell wall monosaccharide analysis (2 mg AIR) and GC vials for lignin analysis (1.2 mg  
268 AIR), respectively, with the Labman robot (0.2 mg tolerance). Cellulose, neutral sugars and  
269 uronic acids were determined following the published one-step two-step hydrolysis protocol  
270 (Yeats et al., 2016). High-performance anion-exchange chromatography with pulsed  
271 amperometric detection (HPAEC-PAD) was performed on a Thermo Fisher Dionex ICS-3000  
272 system with CarboPac PA-20 and PA-200 columns as described (Yeats et al., 2016). Acetyl  
273 bromide soluble lignin was quantified as described (Chang et al., 2008)

274

#### 275 *Phytohormone Analysis*

276 JA and SA were extracted and analysed as described (Engelsdorf et al., 2018). Briefly,  
277 extraction was performed in 10 % methanol / 1 % acetic acid with Jasmonic-d<sub>5</sub> Acid and  
278 Salicylic-d<sub>4</sub> Acid (CDN Isotopes) as internal standards. Quantification was performed on a  
279 Shimadzu UFLC XR / AB SCIEX Triple Quad 5500 system using the following mass  
280 transitions: JA 209 > 59, D<sub>5</sub>-JA 214 > 62, SA 137 > 93, D<sub>4</sub>-SA 141 > 97.

281

#### 282 *Lignin Detection in Roots*

283 Lignification in seedling roots (n>15) was analysed 24 h after start of treatment.  
284 Lignified regions were detected with phloroglucinol-HCL, photographed with a Zeiss Axio  
285 Zoom.V16 stereomicroscope and quantified as described (Engelsdorf et al., 2018).

286

287

## 288 *Statistical Analysis*

289 Statistical significance was assessed using Student's *t*-test in Microsoft Excel (2-tailed  
290 distribution, two-sample unequal variance). Statistically significant differences are indicated by  
291 \*  $p < 0.05$ , \*  $p < 0.01$ . Boxplots were generated using R package "boxplot" with default settings  
292 (range = 1.5\*IQR).

293

294

## 295 **Results**

### 296 **Identification of candidate genes**

297 Previously, we have performed time course experiments to characterize the response of  
298 Arabidopsis seedlings to ISX-induced CWD (Hamann et al., 2009). Affymetrix ATH1  
299 microarrays were used to detect changes in transcript levels up to 36 hours after start of ISX  
300 treatment. The phenotypic characterization of seedlings detected lignin deposition in root tips  
301 and enhanced JA production after 4-6 hours of ISX-treatment (Hamann et al., 2009). Based on  
302 these results we hypothesized that genes exhibiting transcriptional changes after 4 hours might  
303 be involved in CWD responses (phytohormone and lignin production) as well as cell wall  
304 modifying processes in general. Analysis of the microarray derived expression data suggested  
305 that the transcript levels of several hundred genes change after 4 hours of exposure to ISX. We  
306 used public expression data ([www.genevestigator.com](http://www.genevestigator.com)) to identify genes exhibiting differential  
307 expression after 4 hours of ISX treatment and elevated expression in tissue types where cell  
308 wall modification or production occurs preferentially (primary root elongation zone and  
309 expanding hypocotyl). To determine whether these candidates are involved in cell wall related  
310 processes, we decided to perform a pilot study characterizing the phenotypes of T-DNA  
311 insertion lines for 23 candidate genes. Supporting information Table 1 (Table S1) lists the 23  
312 candidate genes with their database annotations, the probe sets representing the genes on the  
313 Affymetrix ATH1 microarray and insertion lines used for characterization. Figure S1

314 summarizes the microarray-derived expression data for the 23 candidate genes generated in the  
315 original time course expression profiling experiments. The genes are separated based on their  
316 transcript levels either being apparently increased (Figure S1a) or decreased (Figure S1b) over  
317 time. Figure S2 illustrates the putative transcript levels of the candidate genes in different  
318 tissues / organs. The genevestigator-derived expression data suggest that several candidate  
319 genes are involved in cellular and biological processes, which affect or involve plant cell wall  
320 metabolism.

321

### 322 **FTIR-based analysis detects cell wall phenotypes in mutant seedlings**

323 Performing detailed cell wall analysis for insertion lines in 23 candidate genes would be  
324 time consuming and possibly not very efficient. Previously, FTIR has been successfully used  
325 as an efficient approach to classify *Arabidopsis* mutants with altered cell wall architecture  
326 (Mouille et al., 2003). We used this approach as foundation to facilitate identification of  
327 insertions in candidate genes leading to changes in cell wall composition or structure in  
328 *Arabidopsis* seedlings. FTIR spectra were collected for analysis from total cell wall material  
329 derived from 6 days-old, liquid culture grown Col-0 seedlings or seedlings with T-DNA  
330 insertions in the candidate genes. Initially only Col-0 samples were characterized to establish  
331 the variability observed in controls. Subsequently, twice the standard deviation of the Col-0  
332 variability was used as a cut-off to identify insertions in candidate genes causing significant  
333 changes in the FTIR spectra. Based on this criterium FTIR spectra for 14 of the 23 insertion  
334 lines analyzed exhibited significant differences (Figure S3). Pronounced differences were  
335 observed for insertions in *At5g24140* (*SQUALENE MONOOXYGENASE2*, *SQP2*) and  
336 *At5g49360* (*BETA-XYLOSIDASE1*, *ATBXL1*) in the 1700-1600  $\text{cm}^{-1}$  (pectin ester, carboxylate  
337 / carbonyl side groups) and 1200-950  $\text{cm}^{-1}$  (characteristic for cellulose and elements of pectic  
338 polysaccharides) areas (Figure S3, blue rectangle) (Arsovski et al., 2009; Rasbery et al., 2007;  
339 Szymanska-Chargot et al., Insertion lines for *At2g41820* (*PHLOEM INTERCALATED WITH*

340 XYLEM / TRACHEARY ELEMENT DIFFERENTIATION INHIBITORY FACTOR  
341 RECEPTOR-CORRELATED 3, PXC3), *At3g11340* (UDP GLYCOSYLTRANSFERASE 76B1,  
342 UGT76B1), *At4g33420* (PEROXIDASE 47, PRX47), *At4g35630* (PHOSPHOSERINE AMINO-  
343 TRANSFERASE 1, PSAT 1), *At5g48460* (FIMBRIN 2, ATFIM2), *At5g47730* (SEC14-  
344 HOMOLOGUE 19, SFH19) and *At5g65390* (ARABINOGALACTAN PROTEIN 7, AGP7)  
345 exhibited differences in the 1367-1200 cm<sup>-1</sup> area typical for certain cellulose elements,  
346 hemicelluloses and pectins (Figure S3, red rectangles) (Maksym et al., 2018; Seifert, 2018;  
347 Szymanska-Chargot et al., 2015; Tokunaga et al., 2009; Wang et al., 2013; Wulfert & Krueger,  
348 2018; Zhang et al., 2016). In the 1200-950 cm<sup>-1</sup> area distinctive differences were detected for  
349 insertion lines in five candidate genes *At1g07260* (UGT71C3), *At1g74440*, *At2g35730*,  
350 *At3g13650* (DIRIGENT PROTEIN 7, DIR7) and *At4g33300* (ACTIVATED DISEASE  
351 RESISTANCE-LIKE 1, ADRI-L1) (Figure S3, purple rectangles) (Dong et al., 2016; Meier et  
352 al., 2008; Paniagua et al., 2017; Rehman et al., 2018; Wuest et al., 2010). The results from the  
353 FTIR-based analysis of the insertion lines suggested that cell wall composition or structure is  
354 affected in seedlings with insertions for 14 of the 23 candidate genes examined. The insertions  
355 seemed to have distinct effects on cell wall composition / structure based on their apparent  
356 separation into three groups.

357

#### 358 **Four candidate genes are selected for more detailed characterization**

359 We selected four candidate genes for a more detailed analysis (*At3g13650*, *At2g35730*,  
360 *At5g47730* and *At2g41820*, Table 1) because of the limited knowledge available regarding their  
361 biological functions and the four insertions leading to two qualitatively different FTIR  
362 phenotypes. This enabled us to determine also if insertion lines resulting in similar FTIR cell  
363 wall phenotypes on the seedling level exhibit similar cell wall phenotypes on the adult plant  
364 level. While *At3g13650* and *At2g35730* FTIR-spectra (orange, yellow) seemed to deviate from  
365 Col-0 controls mainly in areas characteristic for cellulose and certain types of pectins,

366 *At5g47730* and *At2g41820* spectra (green, blue) deviated mainly in areas characteristic for  
367 cellulose elements, hemicelluloses and pectins (Figure 1, numbers highlight wavenumbers  
368 diagnostic for certain bands in the spectra according to Szymanska-Chargot et al., 2015). These  
369 four genes were classified as WALL STRESS RESPONSE genes or WSRs. *At3g13650* (*WSR1*,  
370 *DIR7*) belongs to a family of disease resistance responsive proteins, which have been implicated  
371 in lignan biosynthesis and formation of the casparian strip (Barbosa et al., 2019; Paniagua et  
372 al., 2017). Analysis of the available data suggests that *At2g35730* (*WSR2*) is expressed in the  
373 female gametophyte and encodes a heavy metal transport / detoxification superfamily protein  
374 (De Abreu-Neto et al., 2013; Wuest et al., 2010). Protein homology suggests that *At5g47730*  
375 (*WSR3*, *SFH19*) is related to SEC14 proteins from *S. cerevisiae*, which have been implicated in  
376 polarized vesicle transport (KF de Campos & Schaaf, 2017). *At2g41820* (*WSR4*, *PXC3*)  
377 encodes a putative leucine-rich repeat receptor kinase, belonging to a family where other  
378 members have been implicated in organization of secondary vascular tissue (Wang et al., 2013).  
379

### 380 **Quantitative gene expression analysis confirms transcriptomics results and suggests** 381 **THE1 is controlling *WSR* gene expression**

382 DNA microarray-based expression analysis of Arabidopsis seedlings suggested that the  
383 transcript levels of the *WSR* genes are changing in response to ISX treatment (Figure S1). To  
384 confirm this, we performed time course experiments and transcript levels of the four genes were  
385 determined through quantitative reverse transcription – polymerase chain reaction (qRT - PCR)  
386 in mock- or ISX-treated seedlings. The transcript levels of *WSR1*, 2 and 3 increased after 4  
387 hours of ISX treatment and remained elevated compared to mock controls (Figure 2a).  
388 Transcript levels of *WSR4* were reduced after an initial transient increase. To establish if  
389 expression of the *WSR* genes is controlled by the THE1-mediated CWI maintenance mechanism  
390 we investigated *WSR* transcript levels in THE1 loss (*the1-1*) - or gain-of-function (*the1-4*)  
391 seedlings (Hematy et al., 2007; Merz et al., 2017). In ISX-treated Col-0 seedlings *WSR1*, 2 and

392 3 transcript levels were increased while *WSR4* seemed slightly reduced after eight hours (Figure  
393 2b). *WSR1* transcript levels were not increased in *the1-1* seedlings but the increase was  
394 enhanced in *the1-4*. *WSR2* transcript levels changed in *the1-1* seedlings as in Col-0 while the  
395 increase was enhanced in *the1-4*. Increases in *WSR3* expression were apparently slightly  
396 reduced in *the1-1* seedlings compared to Col-0 while the increase was again more pronounced  
397 in *the1-4* than in ISX-treated Col-0 seedlings. Decrease of *WSR4* expression seemed absent in  
398 *the1-1* compared to ISX-treated Col-0 seedlings and was enhanced in ISX-treated *the1-4*  
399 seedlings. In conclusion, both DNA microarray and qRT-PCR expression analyses showed that  
400 transcript levels of *WSR1*, 2 and 3 increased while *WSR4* decreased in ISX-treated seedlings  
401 over time. *WSR* transcript levels seem to be influenced to different degrees by changes in THE1  
402 activity with increased THE1 activity affecting all *WSR* genes while decreased THE1 activity  
403 seems to affect particularly strongly *WSR1*.

404

#### 405 **Identification of knockout and knockdown alleles for *WSR* genes**

406 Using knockout (KO) or knockdown (KD) alleles generated through T-DNA  
407 insertions is a well-established and successful method to characterize genes of interest (Alonso  
408 et al., 2003). We identified two independent T-DNA insertion lines for each of the four genes  
409 using the Arabidopsis Gene Mapping Tool (<http://signal.salk.edu/cgi-bin/tdnaexpress>). Plants  
410 homozygous for the insertions were isolated using PCR-based genotyping as well as insertion  
411 positions in the individual gene and their effects on transcript levels determined. For *WSR1* the  
412 first insertion is located in the 5' (*wsr1-1*, Salk\_046217) and the second (*wsr1-2*, Salk\_092919)  
413 in the 3' untranslated region of the gene (Figure S4a). The insertions in *WSR2* were mapped to  
414 the first intron (*wsr2-2*, Salk\_123509) and the third exon (*wsr2-1*, Salk\_058271) (Figure S4b).  
415 For *WSR3* the insertions were located either in the promoter region (*wsr3-2*, SALK\_079548) or  
416 in the 10<sup>th</sup> intron (*wsr3-1*, SALK\_039575) (Figure S4c). In the *wsr4-2* (SALK\_121365) allele  
417 the insertion is located in the 1<sup>st</sup> while the one giving rise to the *wsr4-1* (SALK\_082484) allele



418 is located in the 2<sup>nd</sup> exon (Figure S4d). To determine if the insertions affect transcript levels of  
419 the genes, we performed qRT-PCR using total RNA isolated from mock-treated 7 days-old  
420 seedlings. These experiments identified four bona fide KO- (*wsr2-1*, *wsr2-2*, *wsr3-1*, *wsr4-2*)  
421 and four KD-alleles (*wsr1-1*, *wsr1-2*, *wsr3-2* and *wsr4-1*) for the candidate genes (Figure S4a-  
422 d).

423

#### 424 **Responses to ISX-induced CWD are modified in seedlings with insertions in *WSR1* or *4***

425 ISX-induced CWD leads to lignin deposition in seedling root tips as well as increased  
426 JA and SA production (Cano-Delgado et al., 2003; Ellis & Turner, 2001; Hamann et al., 2009).  
427 Here we investigated if the KO / KD alleles isolated for the candidate genes affect these  
428 responses by performing experiments with mock or ISX-treated seedlings in liquid culture.  
429 After treating the seedlings for seven hours we measured both JA and SA levels (Figure 3a, b).  
430 In ISX-treated *wsr4-2* seedlings, we detected reduced production of JA while SA levels were  
431 lower in *wsr1-2* seedlings. Lignin was detected after 24 h of ISX treatment using phloroglucinol  
432 and quantified using image analysis (Engelsdorf et al., 2018). Mock-treated seedling roots did  
433 not show any lignin deposition (Figure 4, Figure S5). We only detected a significant reduction  
434 in ISX-treated *wsr4-2* seedlings in lignification after ISX-treatment. These results suggested  
435 that *WSR1* and *4* might be involved in the response to ISX-induced CWD.

436

#### 437 ***WSR1*, *2*, *3* and *4* contribute to cell wall formation during stem growth**

438 To determine whether the genes of interest affect cell wall metabolism in general, the  
439 levels of cellulose, uronic acids and neutral cell wall sugars were determined in cell wall  
440 preparations from rosette leaves and mature stems of Col-0 and *wsr* mutant plants. Here we  
441 only investigated the strongest KO or KD allele for each candidate gene. We detected a  
442 reduction in cellulose content only in leaves of *wsr4-2* plants compared to Col-0 (Figure 5a).  
443 Our quantification of cellulose in mature stems detected increased amounts in *wsr1-2* and *wsr2-*



444 *1*, while cellulose was reduced in *wsr4-2* stems (Figure 5b). Analysis of lignin content in stems  
445 of adult plants did not detect any differences between Col-0 and mutant plants (Figure S6).  
446 Analysis of neutral cell wall sugars and uronic acids in leaves detected only for the low-  
447 abundant glucuronic acid in *wsr1-2* significant differences to Col-0 controls (Figure 6a). In  
448 stem-derived material, we observed enhanced levels of rhamnose and xylose in *wsr1-2* (Figure  
449 6b). In *wsr3-1* stems fucose, rhamnose, arabinose and galactose contents were elevated. In  
450 *wsr4-2* glucose amounts were reduced while mannose was slightly enhanced compared to Col-  
451 0 controls. To summarize, our cell wall analyses detected differences in cellulose and different  
452 neutral cell wall sugar contents with effects detected most pronounced in stems. The similarities  
453 and variability observed regarding cell wall phenotypes suggest that the different genes may be  
454 involved in distinct but also overlapping aspects of cell wall metabolism in adult plants.

455

#### 456 **Plants with insertions in *WSR1* exhibit pathogen response phenotypes**

457 It has been shown previously that the CWI monitoring RLKs *THE1* and *MIK2* affect  
458 pathogen susceptibility (Van der Does et al., 2017). Here we investigated if the mutations in  
459 WSR genes also affect the outcome of plant-pathogen interactions by inoculating adult plants  
460 carrying insertions in the four genes with the necrotrophic fungus *Plectosphaerella cucumerina*  
461 BMM (*PcBMM*) and quantifying fungal biomass five days post inoculation (Figure 7).  
462 *Arabidopsis Gβ 1 (agb1-1)* and *irregular xylem 1 (irx1-6)* plants were included as controls since  
463 they exhibit reduced (*agb1-1*) or enhanced resistance (*irx1-6*) to *PcBMM* infection (Hernandez-  
464 Blanco et al., 2007; Llorente et al., 2005). Fungal growth on infected *wsr2-1*, *3-1* and *4-2* plants  
465 was similar to Col-0 controls. However, growth was significantly enhanced on *wsr1-2* plants,  
466 suggesting that reduction of *WSR1* gene expression affects resistance to *PcBMM* infection and  
467 implicating this gene in disease resistance response.

468

## 469 Discussion

470 In plants a mechanism is existing, which monitors and maintains the functional integrity  
471 of the cell walls (Doblas et al., 2018; Wolf, 2017). This mechanism seems to exhibit similarities  
472 to the one described in *S. cerevisiae* and is capable of detecting CWD and initiating adaptive  
473 changes in cellular and cell wall metabolism to maintain the functional integrity of the wall  
474 (Hamann, 2015). Understanding of the molecular mechanisms underlying CWD perception and  
475 the signaling cascades involved in regulating the CWD response in plants is increasing  
476 (Engelsdorf et al., 2018; Feng et al., 2018). However, our knowledge of the genes and molecular  
477 processes bringing about changes in cell wall metabolism in response to CWD and their  
478 function during growth and development is very limited. Here, we have determined if we can  
479 identify genes mediating responses to CWD in seedlings and cell wall metabolism in adult  
480 plants by combining seedling-derived transcriptomics data with FTIR-based cell wall analysis  
481 of seedlings with T-DNA insertions in selected candidate genes. This approach identified 14  
482 genes (out of 23 original candidates), whose functions are not well understood and which  
483 belong to different gene families (Table S1). Very little is known about the biological function  
484 of *Atlg74440* beyond that it encodes an ER membrane protein. The gene has been implicated  
485 in biotic and abiotic stress responses mediated by Plant Natriuretic Peptides (PNPs) based on  
486 co-expression with *AtPNP-A* (Meier et al., 2008). *ATFIM2* encodes a protein belonging to the  
487 Fimbrin family and seems to modulates the organization of actin filaments (Zhang et al., 2016).  
488 *SQE2* encodes a squalene epoxidase converting squalene into oxidosqualene, which forms the  
489 precursor of all known angiosperm cyclic triterpenoids (Rasbery et al., 2007). Triterpenoids are  
490 required for production of membrane sterols and brassinosteroids. *PSAT1* encodes an amino  
491 transferase required for Serine biosynthesis taking place in the chloroplast (Wulfert & Krueger,  
492 2018). Serine biosynthesis in turn is required during photorespiration, a prerequisite for  
493 carbohydrate metabolism and plant growth. While AGPs have been implicated in cell wall  
494 remodeling, very little information is available regarding the specific function of AGP7 in this

495 context (Seifert, 2018). *AtBXL1* encodes an enzyme acting during vascular differentiation as a  
496  $\beta$ -D-xylosidase while acting as an  $\alpha$ -L-arabinofuranosidase during seed coat development  
497 (Arsovski et al., 2009). *PRX47* encodes a putative peroxidase, is apparently expressed in  
498 differentiating vascular tissue in seedling roots and stems and involved in lignification  
499 (Tokunaga et al., 2009). *UGT71C3* and *UGT76B1* encode UDP-glycosyltransferases (UGTs),  
500 which have been implicated in glycosylation of phytohormones and / or metabolites during the  
501 response to biotic and abiotic stress (Rehman et al., 2018). *UGT76B1* in particular seems to  
502 glycosylate isoleucic acid, which is required for coordination of SA- and JA-based defence  
503 responses active during infection by pathogens like *Pseudomonas syringae* and *Alternaria*  
504 *brassicicola* (Maksym et al., 2018). *ADR1-L1* encodes a coiled-coil nucleotide-binding leucine-  
505 rich repeat protein and forms an important element of the effector-triggered immunity in plants  
506 (Bonardi et al., 2011; Dong et al., 2016). Reviewing the available knowledge provides further  
507 evidence that several of the genes (*PRX47*, *SQE2*, *ATBXL1*, *AGP7*, *PSATI*) are probably  
508 required for processes relevant for cell wall or plasmamembrane metabolism. Intriguingly  
509 *UGT76B1*, *UGT71C3*, *ADR1-L1* have been implicated before in the responses to abiotic or  
510 biotic stress, which also involves plant cell walls (Bonardi et al., 2011; Maksym et al., 2018;  
511 Rehman et al., 2018). In our experimental conditions the seedlings are exposed to CWD but not  
512 biotic / abiotic stress. Thus raising the possibility that these genes are actually responding to  
513 cell wall-related events, which may also occur during biotic and abiotic. More importantly the  
514 results suggest that the approach pursued here enables us to identify amongst the many genes  
515 in the Arabidopsis genome those that contribute to the responses to CWD and regulation of  
516 relevant aspects of cell wall and membrane metabolism.

517 We characterized four candidate genes in more detail. These had been selected based on  
518 the FTIR phenotypes apparently caused by insertions in the candidate genes and the limited  
519 detailed knowledge regarding their biological functions. qRT-PCR-based expression analysis  
520 of the four genes in ISX-treated seedlings yielded results similar to the data from the

521 transcriptomics experiment. Experiments with loss- and gain-of-function alleles of THE1  
522 showed that ISX-induced changes in the transcript levels of *WSR1*, 2, 3 and 4 are sensitive to  
523 an increase in the activity of THE1 (*the1-4*) while effects of reductions (*the1-1*) are less  
524 pronounced (Merz et al., 2017). These results are to be expected since complete loss of THE1  
525 results in reduced responses to CWD but not complete losses, suggesting that the THE1-  
526 mediated CWI maintenance mechanism is either redundantly organized or other signaling  
527 mechanisms exist (Engelsdorf et al., 2018). However, the results support the notion that *WSR*  
528 gene expression is regulated by the THE1-mediated CWI maintenance mechanism and that  
529 *WSR* activity might be controlled on the transcriptional level.

530 Table 2 provides a global overview of the phenotypes observed for the insertion lines in  
531 the four genes. Reduction of *WSR1* and *WSR2* activity seemed to cause similarly pronounced  
532 FTIR phenotypes in an area where diagnostic signals for cellulose and pectins are normally  
533 found (Figure 1). For *wsr1-2*, we detected increased amounts of cellulose, rhamnose and xylose  
534 in stem-derived material while glucuronic acid was reduced in leaf material (Figures 5, 6). ISX-  
535 induced SA production in seedlings and resistance to *PcBMM* in adult plants were reduced  
536 (Figures 3, 7). In *wsr2-1* plants, we also detected an increase in cellulose in stem-derived  
537 material while responses to CWD, *PcBMM* susceptibility and non-cellulosic cell wall matrix  
538 composition were similar to the controls (Figures 3, 5, 6, 7). Reductions in *WSR3* and 4  
539 expression seemed to result in FTIR phenotypes related to cellulose elements, hemicelluloses  
540 and pectins (Figure 1). In *wsr3-1* stem-derived cell wall material, we detected significant  
541 differences in the amounts of fucose, rhamnose, arabinose and galactose compared to controls  
542 (Figure 6). In *wsr4-2*, cellulose content was reduced both in stem- and leaf-derived cell wall  
543 material, while the amounts of glucose and mannose in stem-derived material were reduced and  
544 increased, respectively (Figure 2, 5, 6). Analysis of responses to CWD found reduced JA and  
545 lignin production in ISX-treated *wsr4-2* seedlings and no differences to wild type in *wsr3-1*  
546 seedlings (Figures 3, 4). The phenotype observed in *wsr2-1* in combination with the limited

547 available protein information provides unfortunately no new insights regarding the function of  
548 WSR2 (De Abreu-Neto et al., 2013). The specific effects on neutral cell wall sugars in *wsr3-1*  
549 plants suggest that WSR3 could contribute to cell wall polysaccharide metabolism possibly by  
550 mediating transport between the Golgi (where non-cellulosic cell wall polysaccharides  
551 containing fucose, rhamnose, arabinose, galactose are synthesized) and the plasmamembrane  
552 (Temple et al., 2016). This would make sense bearing in mind that WSR3 / SFH19 belongs to  
553 the SEC14-protein family, whose members have been implicated in phosphoinositide  
554 production required for membrane homeostasis and signaling processes regulating cellular  
555 processes like vesicle transport (Gerth et al., 2017; de Campos & Schaaf, 2017). These results  
556 implicated *WSR2* and *WSR3* in cell wall metabolism but not in the representative responses to  
557 CWD examined here. Both *WSR1/DIR7* and *WSR4/PXC3* seem to be required for CWD  
558 responses on the seedling levels and for specific aspects of cell wall metabolism in adult plants,  
559 suggesting that they are both involved in CWD-induced signaling processes regulating changes  
560 in cell wall composition. *WSR1* seems only required for increased SA production in response  
561 to ISX-induced CWD, whereas *WSR4* is required for both JA and lignin production. The *wsr4-*  
562 2 phenotypes were similar to those described for CWD responses in *mik2* seedlings where also  
563 only JA and lignin production differ from controls while SA amounts are similar (Engelsdorf  
564 et al., 2018; Van der Does et al., 2017). These results suggest that both RLKs are required for  
565 the same aspects of CWI maintenance. The THE1-dependent reduction in *WSR4* transcript  
566 levels in response to CWD suggest it could repress CWD-induced responses. This would be  
567 similar to the CWD response phenotypes of *FER*, where a *FER* KD leads to enhanced  
568 production of JA, SA and lignin (Engelsdorf et al., 2018). However, the *WSR4* loss of function  
569 phenotypes suggest the RLK is required for ISX-induced JA and lignin production. This implies  
570 the existence of additional regulatory elements interacting with *WSR4* to give rise to the  
571 observed mutant phenotypes. Since the related RLK *PXC1* has been implicated in vascular

572 development a function for WSR4 in coordination of CWD perception with cell wall  
573 metabolism is conceivable (Wang et al., 2013).

574 To summarize, seedlings with T-DNA insertions in 14 of the 23 candidate genes that  
575 were selected in this study exhibited FTIR phenotypes. Gene expression analysis showed that  
576 *WSR* gene expression is modulated in response to ISX-induced CWD, with the modulation  
577 apparently sensitive to changes in THE1 activity. This connected the genes identified to the  
578 THE1-dependent CWI maintenance mechanism, suggesting that our approach has identified  
579 new components mediating CWI maintenance in Arabidopsis. Follow up studies with KO or  
580 KD lines for the four candidate genes found cell wall phenotypes in adult plants for all four and  
581 effects on CWD responses for *WSR1* and *4*. These results also suggest strongly that a more  
582 detailed analysis of the remaining 10 candidate genes identified, will probably yield interesting  
583 novel insights into the mode of action of the CWI maintenance mechanism and cell wall  
584 metabolism in general.

585

## 586 **Acknowledgments**

587 This work was supported through Gatsby AdHoc funds and a grant from the Peder Sather  
588 Center for Advanced Study to T.H. and Chris Somerville. L.K. was supported by a Ph.D.  
589 Fellowship from the Porter Institute at Imperial College and I.C. by a PhD fellowship provided  
590 by the Royal Thai government. L.D. and A.W were supported through postdoctoral fellowships  
591 provided by the Porter Institute at Imperial College. T.E. was supported through a EU Marie  
592 Curie Fellowship “SUGAROSMO-SIGNALLING” and a DFG postdoctoral fellowship (EN  
593 1071/1-1). N.G. was supported through the EEA project grant CYTOWALL. Research by A.M.  
594 was supported by Spanish Ministry of Economy and Competitiveness (MINECO) grant  
595 BIO2015-64077-R. Programming support from Ane-Kjersti Vie and help with lignin and  
596 phytohormone quantification from Trude Johansen and the PROMEC facility at NTNU are  
597 gratefully acknowledged. The authors declare they have no conflicts of interest.

- 598 Alonso, J. M., Stepanova, A. N., Leisse, T. J., Kim, C. J., Chen, H., Shinn, P., Ecker, J. R.  
599 (2003). Genome-wide insertional mutagenesis of *Arabidopsis thaliana*. *Science*,  
600 301(5633), 653–657. <https://doi.org/10.1126/science.1086391>
- 601 Arsovski, A. A., Popma, T. M., Haughn, G. W., Carpita, N. C., McCann, M. C., & Western,  
602 T. L. (2009). AtBXL1 Encodes a Bifunctional -D-Xylosidase/ -L-Arabinofuranosidase  
603 Required for Pectic Arabinan Modification in *Arabidopsis* Mucilage Secretory Cells.  
604 *Plant Physiology*, 150(3), 1219–1234. <https://doi.org/10.1104/pp.109.138388>
- 605 Bacete, L., Mérida, H., Miedes, E., & Molina, A. (2018). Plant cell wall-mediated immunity:  
606 cell wall changes trigger disease resistance responses. *Plant J*, 93(4), 614–636.  
607 <https://doi.org/10.1111/tpj.13807>
- 608 Barbosa, I. C. R., Rojas-Murcia, N., & Geldner, N. (2019). The Casparian strip—one ring to  
609 bring cell biology to lignification? *Current Opinion in Biotechnology*, 56, 121–129.  
610 <https://doi.org/10.1016/j.copbio.2018.10.004>
- 611 Bidhendi, A. J., & Geitmann, A. (2015). Relating the mechanics of the primary plant cell wall  
612 to morphogenesis. *Journal of Experimental Botany*, 67(2), erv535.  
613 <https://doi.org/10.1093/jxb/erv535>
- 614 Bonardi, V., Tang, S., Stallmann, A., Roberts, M., Cherkis, K., & Dangl, J. L. (2011).  
615 Expanded functions for a family of plant intracellular immune receptors beyond  
616 specific recognition of pathogen effectors. *Proceedings of the National Academy of*  
617 *Sciences*, 108(39), 16463–16468. <https://doi.org/10.1073/pnas.1113726108>
- 618 Cano-Delgado, A., Penfield, S., Smith, C., Catley, M., & Bevan, M. (2003). Reduced  
619 cellulose synthesis invokes lignification and defense responses in *Arabidopsis*  
620 *thaliana*. *Plant J*, 34(3), 351–362. <https://doi.org/10.1046/j.1365-3113.2003.01729.x> [pii]
- 621 Chang, X. F., Chandra, R., Berleth, T., & Beatson, R. P. (2008). Rapid, microscale, acetyl  
622 bromide-based method for high-throughput determination of lignin content in



- 623 *Arabidopsis thaliana*. *Journal of Agricultural and Food Chemistry*, 56(16), 6825–34.  
624 <https://doi.org/10.1021/jf800775f>
- 625 Chowdhury, J., Schober, M. S., Shirley, N. J., Singh, R. R., Jacobs, A. K., Douchkov, D., &  
626 Little, A. (2016). Down-regulation of the *glucan synthase-like 6* gene (*HvGsl6*) in  
627 barley leads to decreased callose accumulation and increased cell wall penetration by  
628 *Blumeria graminis* f. sp. *hordei*. *New Phytologist*, 212(2), 434–443.  
629 <https://doi.org/10.1111/nph.14086>
- 630 De Abreu-Neto, J. B., Turchetto-Zolet, A. C., De Oliveira, L. F. V., Bodanese Zanettini, M.  
631 H., & Margis-Pinheiro, M. (2013). Heavy metal-associated isoprenylated plant protein  
632 (HIPP): Characterization of a family of proteins exclusive to plants. *FEBS Journal*,  
633 280(7), 1604–1616. <https://doi.org/10.1111/febs.12159>
- 634 De Lorenzo, G., Ferrari, S., Giovannoni, M., Mattei, B., & Cervone, F. (2018). Cell wall traits  
635 that influence plant development, immunity and bioconversion. *Plant J*.  
636 <https://doi.org/10.1111/tpj.14196>
- 637 Denness, L., McKenna, J. F., Segonzac, C., Wormit, A., Madhou, P., Bennett, M., & Hamann,  
638 T. (2011). Cell wall damage-induced lignin biosynthesis is regulated by a reactive  
639 oxygen species- and jasmonic acid-dependent process in *Arabidopsis*. *Plant*  
640 *Physiology*, 156(3), 1364–74. <https://doi.org/10.1104/pp.111.175737>
- 641 Dinakar, C., & Bartels, D. (2013). Desiccation tolerance in resurrection plants: new insights  
642 from transcriptome, proteome and metabolome analysis. *Frontiers in Plant Science* 4,  
643 482. <https://doi.org/10.3389/fpls.2013.00482>
- 644 Doblas, V. G., Gonneau, M., & Höfte, H. (2018). Cell wall integrity signaling in plants:  
645 Malectin-domain kinases and lessons from other kingdoms. *The Cell Surface*, 3, 1–11.  
646 <https://doi.org/10.1016/j.tcs.2018.06.001>
- 647 Doblas, V. G., Smakowska-luzan, E., Fujita, S., Alassimone, J., Barberon, M., Madalinski,  
648 M., & Geldner, N. (2017). Root diffusion barrier control by a vasculature-derived



- 649 peptide binding to the SGN3 receptor, 284, 280–284.
- 650 <https://doi.org/10.1126/science.aaj1562>
- 651 Doblin, M. S., Johnson, K. L., Humphries, J., Newbigin, E. J., & Bacic, A. (Tony) T. (2014).
- 652 Are designer plant cell walls a realistic aspiration or will the plasticity of the plant's
- 653 metabolism win out? *Current Opinion in Biotechnology*, 26, 108–114.
- 654 <https://doi.org/10.1016/j.copbio.2013.11.012>
- 655 Dong, O. X., Tong, M., Bonardi, V., El Kasmi, F., Woloshen, V., Wunsch, L. K., & Li, X.
- 656 (2016). TNL-mediated immunity in *Arabidopsis* requires complex regulation of the
- 657 redundant *ADR1* gene family. *New Phytologist*, 210(3), 960–973.
- 658 <https://doi.org/10.1111/nph.13821>
- 659 Du, S., Qu, L.-J., & Xiao, J. (2018). Crystal structures of the extracellular domains of the
- 660 CrRLK1L receptor-like kinases ANXUR1 and ANXUR2. *Protein Science*, 27(4),
- 661 886–892. <https://doi.org/10.1002/pro.3381>
- 662 Duan, Q., Kita, D., Li, C., Cheung, A. Y., & Wu, H.-M. M. (2010). FERONIA receptor-like
- 663 kinase regulates RHO GTPase signaling of root hair development. *Proceedings of the*
- 664 *National Academy of Sciences of the United States of America*, 107(41), 17821–
- 665 17826. <https://doi.org/10.1073/pnas.1005366107>
- 666 Ellis, C., & Turner, J. G. (2001). The *Arabidopsis* mutant *cev1* has constitutively active
- 667 jasmonate and ethylene signal pathways and enhanced resistance to pathogens. *The*
- 668 *Plant Cell*, 13(5), 1025–1033.
- 669 Engelsdorf, T., Gigli-Bisceglia, N., Veerabagu, M., McKenna, J. F., Vaahtera, L., Augstein,
- 670 F., & Hamann, T. (2018). The plant cell wall integrity maintenance and immune
- 671 signaling systems cooperate to control stress responses in *Arabidopsis thaliana*.
- 672 *Science Signaling*, 11(536), eaao3070. <https://doi.org/10.1126/scisignal.aao3070>
- 673 Escobar-Restrepo, J.-M., Huck, N., Kessler, S., Gagliardini, V., Gheyselinck, J., Yang W. C.,
- 674 & Grossniklaus, U. (2007). The FERONIA receptor-like kinase mediates male-female

- 675 interactions during pollen tube reception. *Science*, 317(5838), 656–660.  
676 <https://doi.org/10.1126/science.1143562> [pii] 10.1126/science.1143562
- 677 Feng, W., Kita, D., Peaucelle, A., Cartwright, H. N., Doan, V., Duan, Q., & Dinneny, J. R.  
678 (2018). The FERONIA Receptor Kinase Maintains Cell-Wall Integrity during Salt  
679 Stress through Ca<sup>2+</sup> Signaling. *Current Biology*, 28(5), 666–675.  
680 <https://doi.org/10.1016/j.cub.2018.01.023>
- 681 Franck, C. M., Westermann, J., & Boisson-Dernier, A. (2018). Plant Malectin-Like Receptor  
682 Kinases: From Cell Wall Integrity to Immunity and Beyond. *Annual Review of Plant*  
683 *Biology*, 69(1), 301–328. <https://doi.org/10.1146/annurev-arplant-042817-040557>
- 684 Gerth, K., Lin, F., Menzel, W., Krishnamoorthy, P., Stenzel, I., Heilmann, M., & Heilmann, I.  
685 (2017). Guilt by Association: A Phenotype-Based View of the Plant Phosphoinositide  
686 Network. *Annual Review of Plant Biology*, 68(1), 349–374.  
687 <https://doi.org/10.1146/annurev-arplant-042916-041022>
- 688 Gigli-Bisceglia, N., Engelsdorf, T., Strnad, M., Vaahtera, L., Khan, G. A., Yamoune, A., &  
689 Hamann, T. (2018). Cell wall integrity modulates *Arabidopsis thaliana* cell cycle gene  
690 expression in a cytokinin- and nitrate reductase-dependent manner. *Development*,  
691 145(19), dev166678. <https://doi.org/10.1242/dev.166678>
- 692 Gonneau, M., Desprez, T., Martin, M., Doblaz, V. G., Bacete, L., Miart, F., & Höfte, H.  
693 (2018). Receptor Kinase THESEUS1 Is a Rapid Alkalinization Factor 34 Receptor in  
694 *Arabidopsis*. *Current Biology*, 28(15), 2452–2458.  
695 <https://doi.org/10.1016/j.cub.2018.05.075>
- 696 Guo, H., Nolan, T. M., Song, G., Liu, S., Xie, Z., Chen, J., & Yin, Y. (2018). FERONIA  
697 Receptor Kinase Contributes to Plant Immunity by Suppressing Jasmonic Acid  
698 Signaling in *Arabidopsis thaliana*. *Current Biology*, 28(20): 3316-3324  
699 <https://doi.org/10.1016/j.cub.2018.07.078>

- 700 Gutierrez, R., Lindeboom, J. J., Paredez, A. R., Emons, A. M., & Ehrhardt, D. W. (2009).  
701 Arabidopsis cortical microtubules position cellulose synthase delivery to the plasma  
702 membrane and interact with cellulose synthase trafficking compartments. *Nat Cell*  
703 *Biol*, 11(7), 797–806. <https://doi.org/ncb1886> [pii] 10.1038/ncb1886
- 704 Hamann, T, Bennett, M., Mansfield, J., & Somerville, C. (2009). Identification of cell-wall  
705 stress as a hexose-dependent and osmosensitive regulator of plant responses. *Plant J*,  
706 57(6), 1015–1026. <https://doi.org/TPJ3744> [pii] 10.1111/j.1365-313X.2008.03744.x
- 707 Hamann, Thorsten. (2015). The plant cell wall integrity maintenance mechanism-concepts for  
708 organization and mode of action. *Plant & Cell Physiology*, 56(2), 215–23.  
709 <https://doi.org/10.1093/pcp/pcu164>
- 710 Han, J.-P., Köster, P., Drerup, M. M., Scholz, M., Li, S., Edel, K. H., & Kudla, J. (2018).  
711 Fine-tuning of RBOHF activity is achieved by differential phosphorylation and Ca<sup>2+</sup>  
712 binding. *New Phytologist*. <https://doi.org/10.1111/nph.15543>
- 713 Harpaz-Saad, S., McFarlane, H. E., Xu, S., Divi, U. K., Forward, B., Western, T. L., &  
714 Kieber, J. J. (2011). Cellulose synthesis via the FEI2 RLK/SOS5 pathway and  
715 cellulose synthase 5 is required for the structure of seed coat mucilage in Arabidopsis.  
716 *Plant J* 68(6), 941–53. <https://doi.org/10.1111/j.1365-313X.2011.04760.x>
- 717 Haruta, M., Sabat, G., Stecker, K., Minkoff, B. B., & Sussman, M. R. (2014). A Peptide  
718 Hormone and Its Receptor Protein Kinase Regulate Plant Cell Expansion. *Science*,  
719 343(6169), 408–411. <https://doi.org/10.1126/science.1244454>
- 720 Heim, D. R., Skomp, J. R., Tschabold, E. E., & Larrinua, I. M. (1990). Isoxaben Inhibits the  
721 Synthesis of Acid Insoluble Cell Wall Materials In Arabidopsis thaliana. *Plant*  
722 *Physiol*, 93(2), 695–700.
- 723 Hematy, K., Sado, P. E., Van Tuinen, A., Rochange, S., Desnos, T., Balzergue, S., & Hofte,  
724 H. (2007). A receptor-like kinase mediates the response of Arabidopsis cells to the

- 725 inhibition of cellulose synthesis. *Curr Biol*, 17(11), 922–931. <https://doi.org/S0960->  
726 9822(07)01396-6 [pii] 10.1016/j.cub.2007.05.018
- 727 Hernandez-Blanco, C., Feng, D. X., Hu, J., Sanchez-Vallet, A., Deslandes, L., Llorente, F., &  
728 Molina, A. (2007). Impairment of cellulose synthases required for Arabidopsis  
729 secondary cell wall formation enhances disease resistance. *Plant Cell*, 19(3), 890–903.  
730 <https://doi.org/tpc.106.048058> [pii] 10.1105/tpc.106.048058
- 731 Jiménez-Quesada, M. J., Traverso, J. Á., & Alché, J. de D. (2016). NADPH Oxidase-  
732 Dependent Superoxide Production in Plant Reproductive Tissues. *Frontiers in Plant*  
733 *Science*, 7. <https://doi.org/10.3389/fpls.2016.00359>
- 734 Kadota, Y., Sklenar, J., Derbyshire, P., Stransfeld, L., Asai, S., Ntoukakis, V., & Zipfel, C.  
735 (2014). Direct regulation of the NADPH oxidase RBOHD by the PRR-associated  
736 kinase BIK1 during plant immunity. *Molecular Cell*, 54(1), 43–55.  
737 <https://doi.org/10.1016/j.molcel.2014.02.021>
- 738 Kanaoka, M. M., & Torii, K. U. (2010). FERONIA as an upstream receptor kinase for polar  
739 cell growth in plants. *Proceedings of the National Academy of Sciences of the United*  
740 *States of America*, 107(41), 17461–2. <https://doi.org/10.1073/pnas.1013090107>
- 741 KF de Campos, M., & Schaaf, G. (2017). The regulation of cell polarity by lipid transfer  
742 proteins of the SEC14 family. *Current Opinion in Plant Biology*, 40, 158–168.  
743 <https://doi.org/10.1016/j.pbi.2017.09.007>
- 744 Kieber, J. J., & Polko, J. (2019). The Regulation of Cellulose Biosynthesis in Plants. *The*  
745 *Plant Cell*, tpc.00760.2018. <https://doi.org/10.1105/tpc.18.00760>
- 746 Lee, Y., Rubio, M. C., Alassimone, J., & Geldner, N. (2013). A mechanism for localized  
747 lignin deposition in the endodermis. *Cell*, 153(2), 402–12.  
748 <https://doi.org/10.1016/j.cell.2013.02.045>

- 749 Levin, D. E. (2011). Regulation of cell wall biogenesis in *Saccharomyces cerevisiae*: the cell  
750 wall integrity signaling pathway. *Genetics*, *189*(4), 1145–75.  
751 <https://doi.org/10.1534/genetics.111.128264>
- 752 Liu, P., Haruta, M., Minkoff, B. B., & Sussman, M. R. (2018). Probing a Plant Plasma  
753 Membrane Receptor Kinase's Three-Dimensional Structure Using Mass  
754 Spectrometry-Based Protein Footprinting. *Biochemistry*, *57*(34), 5159–5168.  
755 <https://doi.org/10.1021/acs.biochem.8b00471>
- 756 Llorente, F., Alonso-Blanco, C., Sanchez-Rodriguez, C., Jorda, L., & Molina, A. (2005).  
757 ERECTA receptor-like kinase and heterotrimeric G protein from *Arabidopsis* are  
758 required for resistance to the necrotrophic fungus *Plectosphaerella cucumerina*. *Plant*  
759 *J*, *43*(2), 165–180. <https://doi.org/10.1111/j.1365-313X.2005.02440.x>
- 760 Maksym, R. P., Ghirardo, A., Zhang, W., von Saint Paul, V., Lange, B., Geist, B., &  
761 Schäffner, A. R. (2018). The Defense-Related Isoleucic Acid Differentially  
762 Accumulates in *Arabidopsis* Among Branched-Chain Amino Acid-Related 2-Hydroxy  
763 Carboxylic Acids. *Frontiers in Plant Science*, *9*.  
764 <https://doi.org/10.3389/fpls.2018.00766>
- 765 Manfield, I. W., Orfila, C., McCartney, L., Harholt, J., Bernal, A. J., Scheller, H. V., &  
766 Willats, W. G. T. (2004). Novel cell wall architecture of isoxaben-habituated  
767 *Arabidopsis* suspension-cultured cells: global transcript profiling and cellular analysis.  
768 *Plant J*, *40*(2), 260–275. <https://doi.org/10.1111/j.1365-313X.2004.02208.x>
- 769 Meier, S., Bastian, R., Donaldson, L., Murray, S., Bajic, V., & Gehring, C. (2008). Co-  
770 expression and promoter content analyses assign a role in biotic and abiotic stress  
771 responses to plant natriuretic peptides. *BMC Plant Biology*, *8*(1), 24.  
772 <https://doi.org/10.1186/1471-2229-8-24>
- 773 Merz, D., Richter, J., Gonneau, M., Sanchez-Rodriguez, C., Eder, T., Sormani, R., & Hauser,  
774 M.-T. (2017). T-DNA alleles of the receptor kinase THESEUS1 with opposing effects

- 775 on cell wall integrity signaling. *Journal of Experimental Botany*, 68(16), 4583–4593.  
776 <https://doi.org/10.1093/jxb/erx263>
- 777 Mouille, G., Robin, S., Lecomte, M., Pagant, S., & Hofte, H. (2003). Classification and  
778 identification of Arabidopsis cell wall mutants using Fourier-Transform InfraRed (FT-  
779 IR) microspectroscopy. *Plant J*, 35(3), 393–404.
- 780 Moussu, S., Augustin, S., Roman, A.-O., Broyart, C., & Santiago, J. (2018). Crystal structures  
781 of two tandem malectin-like receptor kinases involved in plant reproduction. *Acta*  
782 *Crystallographica Section D Structural Biology*, 74(7), 671–680.  
783 <https://doi.org/10.1107/S205979831800774X>
- 784 Nakagawa, Y., Katagiri, T., Shinozaki, K., Qi, Z., Tatsumi, H., Furuichi, T., & Iida, H.  
785 (2007). Arabidopsis plasma membrane protein crucial for Ca<sup>2+</sup> influx and touch  
786 sensing in roots. *Proc Natl Acad Sci U S A*, 104(9), 3639–3644.  
787 <https://doi.org/0607703104> [pii] 10.1073/pnas.0607703104
- 788 Novaković L. , Guo T., Bacic A., Sampathkumar A. & Johnson KL . (2018) Hitting the Wall-  
789 Sensing and Signalling Pathways Involved in Plant Cell Wall Remodeling in Response  
790 to Abiotic Stress. *Plants* 23;7(4). [pii]: E89. doi: 10.3390/plants7040089.
- 791 Paniagua, C., Bilkova, A., Jackson, P., Dabravolski, S., Riber, W., Didi, V., & Hejatko, J.  
792 (2017). Dirigent proteins in plants: modulating cell wall metabolism during abiotic  
793 and biotic stress exposure. *Journal of Experimental Botany*, 68(13), 3287–3301.  
794 <https://doi.org/10.1093/jxb/erx141>
- 795 Paredez, A. R., Somerville, C. R., & Ehrhardt, D. W. (2006). Visualization of cellulose  
796 synthase demonstrates functional association with microtubules. *Science*, 312(5779),  
797 1491–1495. <https://doi.org/1126551> [pii] 10.1126/science.1126551
- 798 Rasbery, J. M., Shan, H., LeClair, R. J., Norman, M., Matsuda, S. P., & Bartel, B. (2007).  
799 Arabidopsis thaliana squalene epoxidase 1 is essential for root and seed development.

- 800           *The Journal of Biological Chemistry*, 282(23), 17002–17013.
- 801           <https://doi.org/10.1074/jbc.M611831200>
- 802   Rehman, H. M., Nawaz, M. A., Shah, Z. H., Ludwig-Müller, J., Chung, G., Ahmad, M. Q., &  
803           Lee, S. I. (2018). Comparative genomic and transcriptomic analyses of Family-1 UDP  
804           glycosyltransferase in three Brassica species and Arabidopsis indicates stress-  
805           responsive regulation. *Scientific Reports*, 8(1). [https://doi.org/10.1038/s41598-018-](https://doi.org/10.1038/s41598-018-19535-3)  
806           19535-3
- 807   Scheible, W. R., Eshed, R., Richmond, T., Delmer, D., & Somerville, C. (2001).  
808           Modifications of cellulose synthase confer resistance to isoxaben and thiazolidinone  
809           herbicides in Arabidopsis Ixr1 mutants. *Proc Natl Acad Sci U S A*, 98(18), 10079–  
810           10084. <https://doi.org/10.1073/pnas.191361598> 191361598 [pii]
- 811   Seifert, G. (2018). Fascinating Fasciclins: A Surprisingly Widespread Family of Proteins that  
812           Mediate Interactions between the Cell Exterior and the Cell Surface. *International*  
813           *Journal of Molecular Sciences*, 19(6), 1628. <https://doi.org/10.3390/ijms19061628>
- 814   Shi, H., Kim, Y., Guo, Y., Stevenson, B., & Zhu, J. K. (2003). The Arabidopsis SOS5 locus  
815           encodes a putative cell surface adhesion protein and is required for normal cell  
816           expansion. *The Plant Cell*, 15(1), 19–32.
- 817   Shih, H. W., Miller, N. N. D. D., Dai, C., Spalding, E. E. P. P., & Monshausen, G. B. B. G.  
818           (2014). The Receptor-like Kinase FERONIA Is Required for Mechanical Signal  
819           Transduction in Arabidopsis Seedlings. *Current Biology*, 24(16), 1887–1892.  
820           <https://doi.org/10.1016/j.cub.2014.06.064>
- 821   Stegmann, M., Monaghan, J., Smakowska-Luzan, E., Rovenich, H., Lehner, A., Holton, N., &  
822           Zipfel, C. (2017). The receptor kinase FER is a RALF-regulated scaffold controlling  
823           plant immune signaling. *Science*, 355, 287–289.  
824           <https://doi.org/10.1126/science.aal2541>



- 825 Szymanska-Chargot, M., Chylinska, M., Kruk, B., & Zdunek, A. (2015). Combining FT-IR  
826 spectroscopy and multivariate analysis for qualitative and quantitative analysis of the  
827 cell wall composition changes during apples development. *Carbohydrate Polymers*,  
828 *115*, 93–103. <https://doi.org/10.1016/j.carbpol.2014.08.039>
- 829 Tateno, M., Brabham, C., & DeBolt, S. (2016). Cellulose biosynthesis inhibitors – a  
830 multifunctional toolbox. *Journal of Experimental Botany*, *67*(2), 533–542.  
831 <https://doi.org/10.1093/jxb/erv489>
- 832 Temple, H., Saez-Aguayo, S., Reyes, F. C., & Orellana, A. (2016). The inside and outside:  
833 topological issues in plant cell wall biosynthesis and the roles of nucleotide sugar  
834 transporters. *Glycobiology*, *26*(9), 913–925. <https://doi.org/10.1093/glycob/cww054>
- 835 Tokunaga, N., Kaneta, T., Sato, S., & Sato, Y. (2009). Analysis of expression profiles of three  
836 peroxidase genes associated with lignification in *Arabidopsis thaliana*. *Physiologia*  
837 *Plantarum*, *136*(2), 237–249. <https://doi.org/10.1111/j.1399-3054.2009.01233.x>
- 838 Van der Does, D., Boutrot, F., Engelsdorf, T., Rhodes, J., McKenna, J. F., Vernhettes, S., &  
839 Zipfel, C. (2017). The *Arabidopsis* leucine-rich repeat receptor kinase MIK2/LRR-  
840 KISS connects cell wall integrity sensing, root growth and response to abiotic and  
841 biotic stresses. *PLOS Genetics*, *13*(6), e1006832.  
842 <https://doi.org/10.1371/journal.pgen.1006832>
- 843 Wang, J., Kucukoglu, M., Zhang, L., Chen, P., Decker, D., Nilsson, O., & Zheng, B. (2013).  
844 The *Arabidopsis* LRR-RLK, PXC1, is a regulator of secondary wall formation  
845 correlated with the TDIF-PXY/TDR-WOX4 signaling pathway. *BMC Plant Biology*,  
846 *13*(1), 1–11. <https://doi.org/10.1186/1471-2229-13-94>
- 847 Wilson, R. H., Smith, A. C., Kacurakova, M., Saunders, P. K., Wellner, N., & Waldron, K.  
848 W. (2000). The mechanical properties and molecular dynamics of plant cell wall  
849 polysaccharides studied by Fourier-transform infrared spectroscopy. *Plant Physiol*,  
850 *124*(1), 397–405.



- 851 Wolf, S. (2017). Plant cell wall signaling and receptor-like kinases. *Biochemical Journal*,  
852 474(4), 471–492. <https://doi.org/10.1042/BCJ20160238>
- 853 Wuest, S. E., Vijverberg, K., Schmidt, A., Weiss, M., Gheyselinck, J., Lohr, M., &  
854 Grossniklaus, U. (2010). Arabidopsis female gametophyte gene expression map  
855 reveals similarities between plant and animal gametes. *Current Biology: CB*, 20(6),  
856 506–512. <https://doi.org/10.1016/j.cub.2010.01.051>
- 857 Wulfert, S., & Krueger, S. (2018). Phosphoserine Aminotransferase1 Is Part of the  
858 Phosphorylated Pathways for Serine Biosynthesis and Essential for Light and Sugar-  
859 Dependent Growth Promotion. *Frontiers in Plant Science*, 9.  
860 <https://doi.org/10.3389/fpls.2018.01712>
- 861 Xu, S.-L. L., Rahman, A., Baskin, T. I., & Kieber, J. J. (2008). Two leucine-rich repeat  
862 receptor kinases mediate signaling, linking cell wall biosynthesis and ACC synthase in  
863 Arabidopsis. *The Plant Cell*, 20(11), 3065–3079. <https://doi.org/tpc.108.063354> [pii]  
864 10.1105/tpc.108.063354
- 865 Xue, H., Veit, C., Abas, L., Tryfona, T., Maresch, D., Ricardi, M. M., & Seifert, G. J. (2017).  
866 *Arabidopsis thaliana* FLA4 functions as a glycan-stabilized soluble factor via its  
867 carboxy-proximal Fasciclin 1 domain. *Plant J*, 91(4), 613–630.  
868 <https://doi.org/10.1111/tpj.13591>
- 869 Yeats, T., Velloso, T., Sorek, N., Ibáñez, A. B., & Bauer, S. (2016). Rapid Determination of  
870 Cellulose, Neutral Sugars, and Uronic Acids from Plant Cell Walls by One-step Two-  
871 step Hydrolysis and HPAEC-PAD. *Bio-Protocol*, 6(20), e1978.  
872 <https://doi.org/10.21769/BioProtoc.1978>
- 873 Yu, F., Qian, L., Nibau, C., Duan, Q., Kita, D., Levasseur, K., & Luan, S. (2012). FERONIA  
874 receptor kinase pathway suppresses abscisic acid signaling in Arabidopsis by  
875 activating ABI2 phosphatase. *Proceedings of the National Academy of Sciences of the*  
876 *United States of America*, 109(36), 14693–8. <https://doi.org/10.1073/pnas.1212547109>

- 877 Zhang, R., Chang, M., Zhang, M., Wu, Y., Qu, X., & Huang, S. (2016). The Structurally  
878 Plastic CH2 Domain Is Linked to Distinct Functions of Fimbrins/Plastins. *Journal of*  
879 *Biological Chemistry*, 291(34), 17881–17896.  
880 <https://doi.org/10.1074/jbc.M116.730069>
- 881 Zhao, F., Chen, W., & Traas, J. (2018). ScienceDirect Mechanical signaling in plant  
882 morphogenesis. *Current Opinion in Genetics & Development*, 51, 26–30.  
883 <https://doi.org/10.1016/j.gde.2018.04.001>  
884

885 **Table 1:** Candidate genes selected from the transcriptomics / FTIR- based screen. Gene  
886 annotations are based on Araport11 and references listed. WSR: Wall Stress Response.

887

888

889

890

891

892

893

894

|             | <b>AGI</b>       | <b>Gene Annotation</b>                                                             | <b>Reference</b>           |
|-------------|------------------|------------------------------------------------------------------------------------|----------------------------|
| <b>WSR1</b> | <i>At3g13650</i> | <i>DIR7</i> , Disease resistance-responsive (dirigent-like protein) family protein | Paniagua et al., 2017      |
| <b>WSR2</b> | <i>At2g35730</i> | Heavy metal transport / detoxification superfamily protein                         | De Abreu-Neto et al., 2013 |
| <b>WSR3</b> | <i>At5g47730</i> | <i>SFH19</i> , Sec14p-like phosphatidylinositol transfer family protein            | De Campos et al., 2017     |
| <b>WSR4</b> | <i>At2g41820</i> | <i>PXC3</i> , Leucine-rich repeat protein kinase family protein                    | Wang et al., 2013          |

895 **Table 2:** Overview of the phenotypes observed for mutant lines of the different candidate  
 896 genes examined. Statistically significant differences compared to the wild type are indicated  
 897 with blue (increased) or red (decreased) arrows.

|                                                    |                   | <i>wsr1</i> | <i>wsr2</i> | <i>wsr3</i> | <i>wsr4</i>      |
|----------------------------------------------------|-------------------|-------------|-------------|-------------|------------------|
| Cell wall damage response<br>(6 day-old seedlings) | JA                | -           | -           | -           | ↓                |
|                                                    | SA                | ↓           | -           | -           | -                |
|                                                    | Lignin            | -           | -           | -           | ↓                |
| Cell wall composition<br>(5 week-old plants)       | Cellulose         | stem ↑      | stem ↑      | -           | leaf ↓<br>stem ↓ |
|                                                    | Fucose            | -           | -           | stem ↑      | -                |
|                                                    | Rhamnose          | stem ↑      | -           | stem ↑      | -                |
|                                                    | Arabinose         | -           | -           | stem ↑      | -                |
|                                                    | Galactose         | -           | -           | stem ↑      | -                |
|                                                    | Glucose           | -           | -           | -           | stem ↓           |
|                                                    | Xylose            | stem ↑      | -           | -           | -                |
|                                                    | Mannose           | -           | -           | -           | stem ↑           |
|                                                    | Galacturonic acid | -           | -           | -           | -                |
|                                                    | Glucuronic acid   | leaf ↓      | -           | -           | -                |
| <i>PcBMM</i> susceptibility<br>(18 day-old plants) |                   | ↑           | -           | -           | -                |

898

899

900 **Figure legends**

901 **Figure 1. Overview of average Fourier-Transform Infrared (FTIR) spectra from Col-0,**  
902 ***wsr1-1*, *wsr2-1*, *wsr3-1* and *wsr4-1* seedlings.** Black lines indicate 2 x SD for Col-0-derived  
903 material. The differently coloured lines for *wsr1-1* (*DIR7*), *wsr2-1* (*At3g35730*), *wsr3-1*  
904 (*SFH19*) and *wsr4-1* (*PXC3*) are based on the normalized average FTIR spectra for Col-0  
905 seedlings minus the average spectra of the individual mutant. Numbers in red indicate bands in  
906 the infrared spectra of plant cell wall material indicative for certain classes of cell wall  
907 polysaccharides.

908

909 **Figure 2. Candidate gene expression profiling in seedlings exposed to cellulose**  
910 **biosynthesis inhibition.**

911 **(a)** Gene expression of *WSR1*, 2, 3 and 4 in Col-0 seedlings at the indicated time points after  
912 mock (empty symbols, dotted lines) or ISX (filled symbols, solid lines) treatment according to  
913 qRT-PCR analysis. Values were normalized to *ACT2* and represent means from 3  
914 independent experiments (n=9). Error bars indicate SD. Asterisks indicate statistically  
915 significant differences (\*p < 0.05) to mock controls according to Student's t test. **(b)**  
916 Transcript levels of *WSR1*, 2, 3 and 4 in Col-0, *the1-1* and *the1-4* seedlings mock (DMSO) or  
917 ISX-treated for 8 hours. Values were normalized to *ACT2* and represent means from 3  
918 independent experiments (n= 8-9). Asterisks indicate statistically significant differences to  
919 mock controls according to Student's t test (\*p < 0.05). The boxes in the boxplot indicate  
920 interquartile range (IQR, between 25<sup>th</sup> and 75<sup>th</sup> percentile) and the black line in the middle of  
921 the box marks the median. The whiskers indicate data points furthest from the median, if they  
922 are still within 1.5xIQR from the closest quartile. The data points outside this range are  
923 plotted individually.

924

925 **Figure 3. Relative jasmonic acid and salicylic acid accumulation in *wsr* seedlings after ISX**  
926 **treatment.**

927 **(a)** Jasmonic acid and **(b)** salicylic acid were quantified in Col-0, *wsr1-1*, *wsr1-2*, *wsr2-1*, *wsr2-*  
928 *2*, *wsr3-1*, *wsr3-2*, *wsr4-1* and *wsr4-2* seedlings after 7 h of mock (empty bars) or ISX (filled  
929 bars) treatment. Bars represent mean values from 3-4 independent experiments and error bars  
930 indicate SD. Asterisks indicate statistically significant differences to the ISX-treated wild type  
931 according to Student's t test (\* $p < 0.05$ ).

932

933 **Figure 4. Relative lignification in *wsr* root tips after ISX treatment.**

934 Lignification in root tips of Col-0, *wsr1-1*, *wsr1-2*, *wsr2-1*, *wsr2-2*, *wsr3-1*, *wsr3-2*, *wsr4-1* and  
935 *wsr4-2* seedlings was quantified after 24 h of ISX treatment. Bars represent mean values from  
936 3 independent experiments and error bars indicate SD. Asterisks indicate statistically significant  
937 differences to the wild type according to Student's t test (\* $p < 0.05$ ).

938

939 **Figure 5. Cellulose content in adult *wsr* plants.**

940 Cellulose content was quantified in cell wall preparations from 5 weeks-old Col-0, *wsr1-2*,  
941 *wsr2-1*, *wsr3-1* and *wsr4-2* plants. **(a)** Leaf cellulose, **(b)** stem cellulose. Bars represent mean  
942 values and error bars indicate SD ( $n = 4$ ). Asterisks indicate statistically significant differences  
943 to the wild type according to Student's t test (\* $p < 0.05$ ; \*\* $p < 0,01$ ).

944

945 **Figure 6. Cell wall matrix monosaccharide composition in adult *wsr* plants.** Relative  
946 amounts of the monosaccharides Fucose, Rhamnose, Arabinose, Galactose, Glucose, Xylose,  
947 Mannose, Galacturonic acid and Glucuronic acid were quantified in cell wall matrix  
948 hydrolysates of 5 weeks-old Col-0, *wsr1-2*, *wsr2-1*, *wsr3-1* and *wsr4-2* plants. **(a)** Leaf  
949 monosaccharides, **(b)** stem monosaccharides. Bars represent mean values and error bars

950 indicate SD (n = 4). Asterisks indicate statistically significant differences to the wild type  
951 according to Student's t test (\*p < 0.05; \*\*p < 0,01).

952

953 **Figure 7 Relative susceptibility of *wsr* plants to *Plectosphaerella cucumerina*.**

954 3 weeks-old Col-0, *wsr1-2*, *wsr2-1*, *wsr3-1*, *wsr4-2*, *irx1-6* (resistance control) and *agbl-1*  
955 (susceptibility control) plants were infected with the necrotrophic leaf pathogen isolate  
956 *Plectosphaerella cucumerina* BMM (*PcBMM*). The relative fungal biomass was determined 5  
957 days post infection (dpi) by qPCR analysis of the *PcBMM*  $\beta$ -tubulin gene. Bars represent mean  
958 values and error bars indicate SD (n = 4-6). Asterisks indicate statistically significant  
959 differences to the wild type according to Student's t test (\*p < 0.05; \*\*p < 0,01).

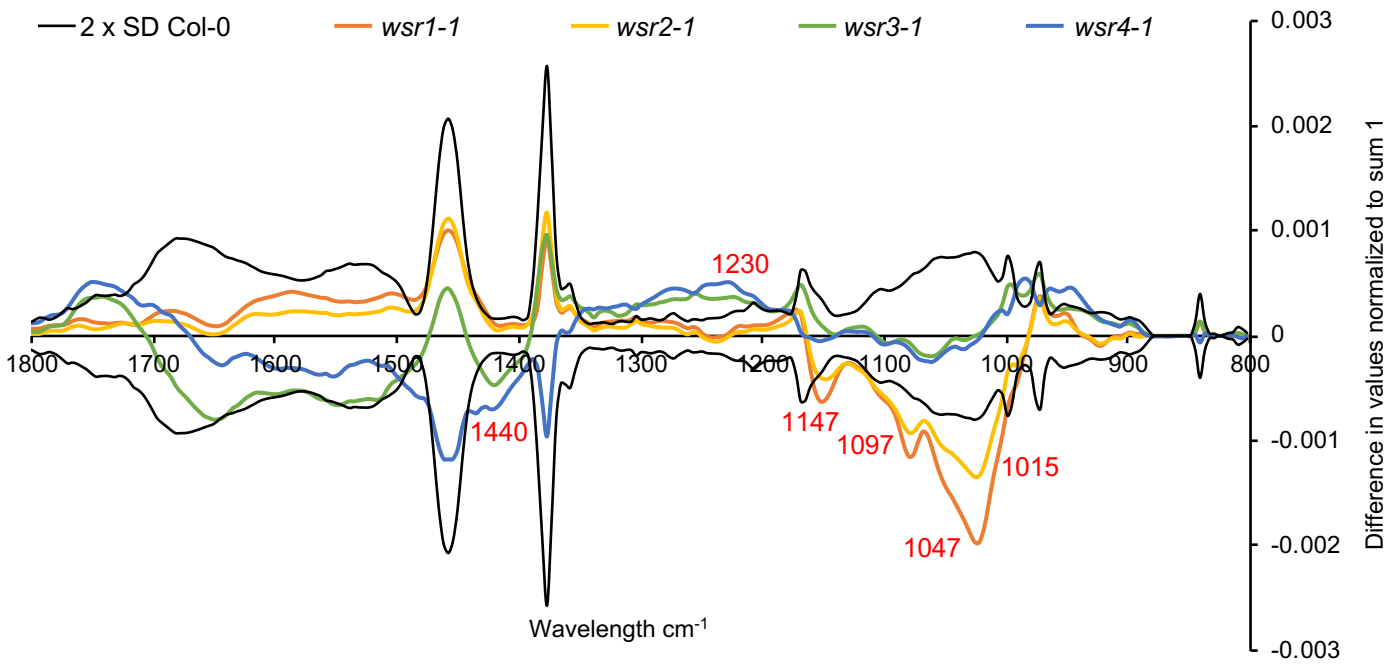

**Figure 1: Overview of average Fourier-Transform Infrared (FTIR) spectra from Col-0, *wsr1-1*, *wsr2-1*, *wsr3-1* and *wsr4-1* seedlings.** Black lines indicate 2 x SD for Col-0 derived material. The different colored lines for *wsr1-1* (*DIR7*), *wsr2-1* (*At3g35730*), *wsr3-1* (*SFH19*) and *wsr4-1* (*PXC3*) are based on the normalized average FTIR spectra for Col-0 seedlings minus the average spectra of the individual mutant. Numbers in red indicate bands in the infrared spectra of plant cell wall material indicative for certain classess of cell wall polysaccharides.



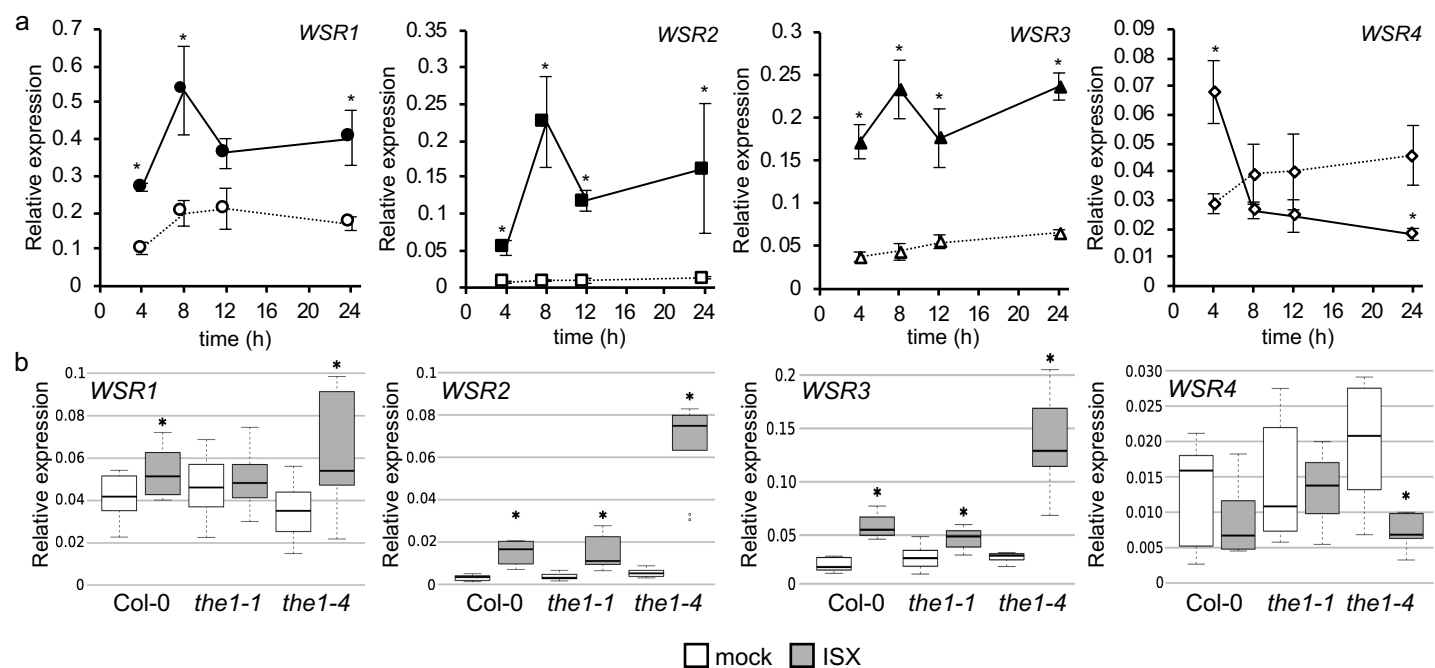

**Figure 2 . Candidate gene expression profiling in seedlings exposed to cellulose biosynthesis inhibition.**  
**(a)** Gene expression of *WSR1*, 2, 3 and 4 in Col-0 seedlings at the indicated time points after mock (empty symbols , dotted lines) or ISX (filled symbols , solid lines) treatment according to qRT-PCR analysis. Values were normalized to *ACT2* and represent means from 3 independent experiments (n=9). Error bars indicate SD. Asterisks indicate statistically significant differences (\*p < 0.05) to mock controls according to Student's t test. **(b)** Transcript levels of *WSR1*, 2, 3 and 4 in Col-0, *the1-1* and *the1-4* seedlings mock (DMSO) or ISX-treated for 8 hours. Values were normalized to *ACT2* and represent means from 3 independent experiments (n= 8-9). Asterisks indicate statistically significant differences to mock controls according to Student's t test (\*p < 0.05). The boxes in the boxplot indicate interquartile range (IQR, between 25<sup>th</sup> and 75<sup>th</sup> percentile) and the black line in the middle of the box marks the median. The whiskers indicate data points furthest from the median, if they are still within 1.5xIQR from the closest quartile. The data points outside this range are plotted individually.

**a** Jasmonic acid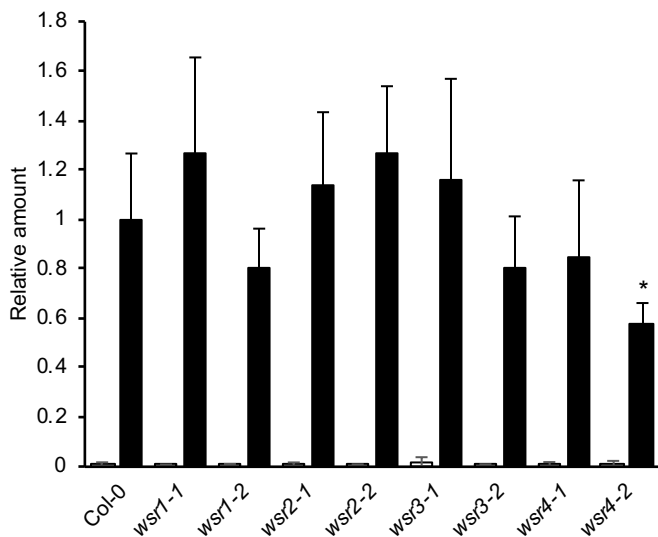**b** Salicylic acid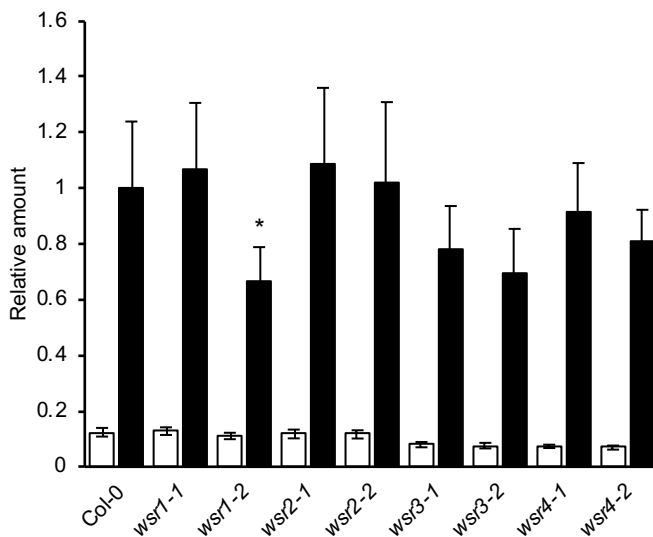

**Figure 3: Relative jasmonic acid and salicylic acid accumulation in *wsr* seedlings after isoxaben treatment.** (a) Jasmonic acid and (b) salicylic acid were quantified in Col-0, *wsr1-1*, *wsr1-2*, *wsr2-1*, *wsr2-2*, *wsr3-1*, *wsr3-2*, *wsr4-1* and *wsr4-2* seedlings after 7 h of mock (empty bars) or ISX (filled bars) treatment. Bars represent mean values from 3-4 independent experiments and error bars indicate SD. Asterisks indicate statistically significant differences to the ISX-treated wild type according to Student's t test (\* $p < 0.05$ ).

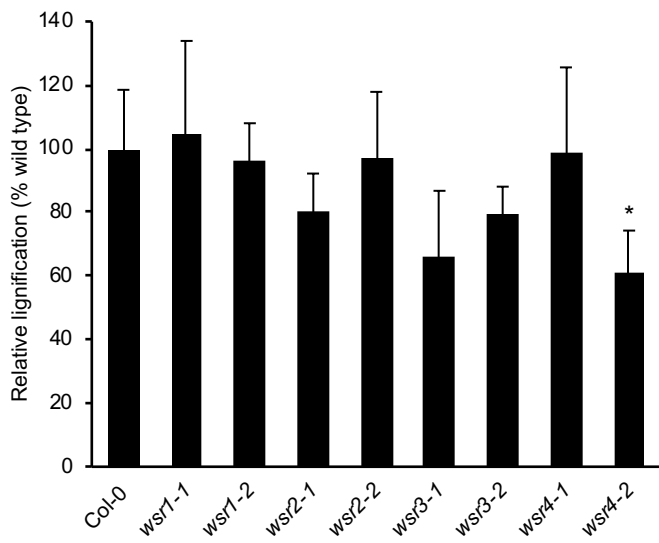

**Figure 4: Relative lignification in *wsr* root tips after ISX treatment.** Lignification in root tips of Col-0, *wsr1-1*, *wsr1-2*, *wsr2-1*, *wsr2-2*, *wsr3-1*, *wsr3-2*, *wsr4-1* and *wsr4-2* seedlings was quantified after 24 h of isoxaben treatment. Bars represent mean values from 3 independent experiments (n= 10-15) and error bars indicate SD. Asterisks indicate statistically significant differences to the wild type according to Student's t test (\* $p < 0.05$ ).

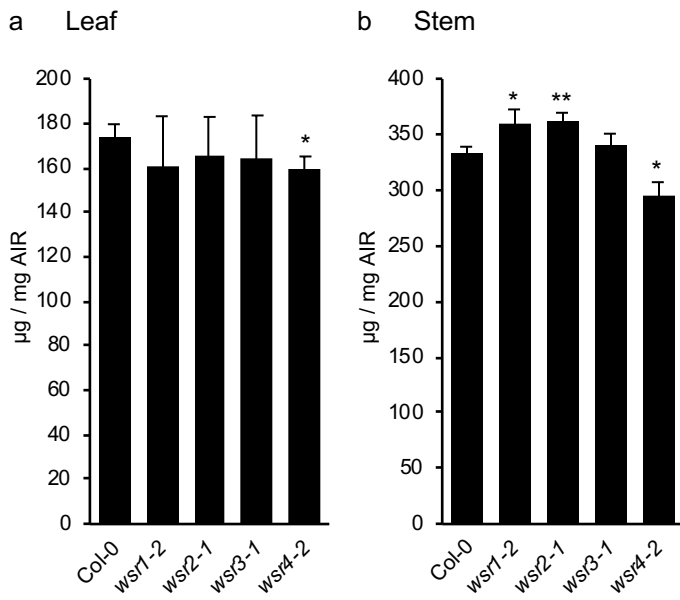

**Figure 5: Cellulose content in adult *wsr* plants.**

Cellulose content was quantified in cell wall preparations from 5 weeks-old Col-0, *wsr1-2*, *wsr2-1*, *wsr3-1* and *wsr4-2* plants. **(a)** Leaf cellulose, **(b)** stem cellulose. Bars represent mean values and error bars indicate SD (n= 4). Asterisks indicate statistically significant differences to the wild type according to Student's t test (\*p < 0.05; \*\*p < 0.01).

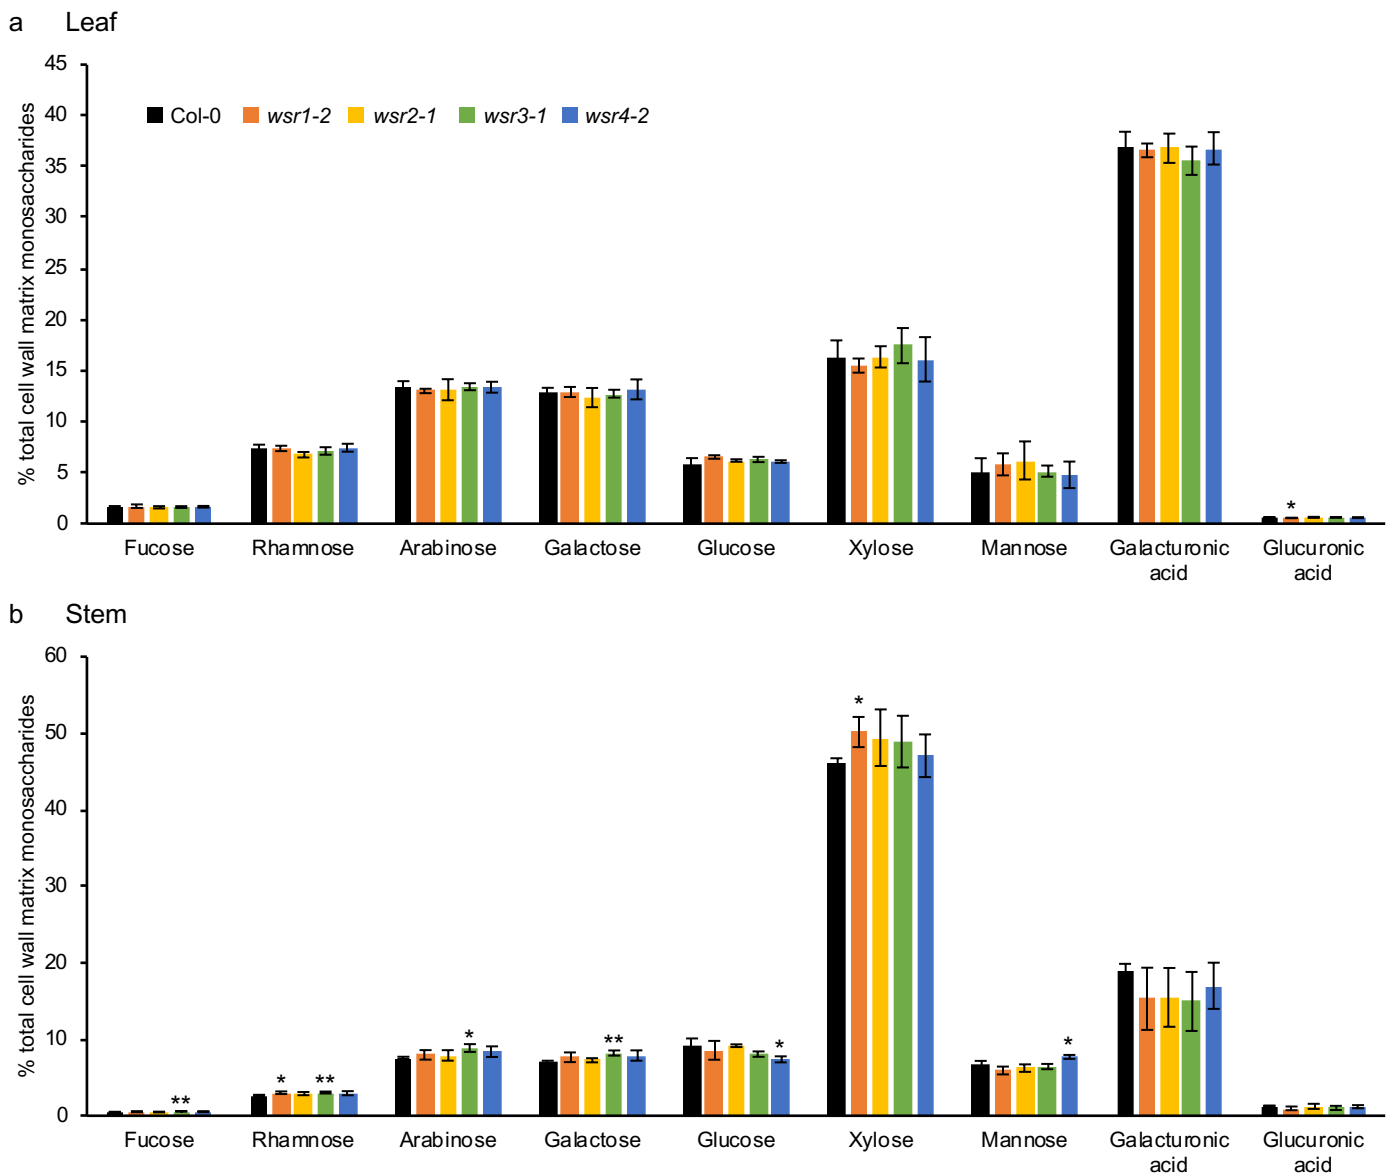

**Figure 6: Cell wall matrix monosaccharide composition in adult *wsr* plants.** Relative amounts of the monosaccharides Fucose, Rhamnose, Arabinose, Galactose, Glucose, Xylose, Mannose, Galacturonic acid and Glucuronic acid were quantified in cell wall matrix hydrolysates of 5 weeks-old Col-0, *wsr1-2*, *wsr2-1*, *wsr3-1* and *wsr4-2* plants. **(a)** Leaf monosaccharides, **(b)** stem monosaccharides. Bars represent mean values and error bars indicate SD (n= 4). Asterisks indicate statistically significant differences to the wild type according to Student's t test (\*p < 0.05; \*\*p < 0.01).

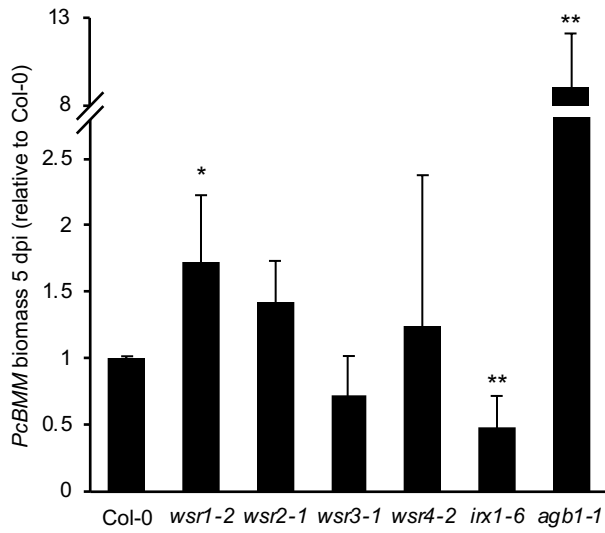

**Figure 7: Relative susceptibility of *wsr* plants to *Plectosphaerella cucumerina*.** 18 days-old Col-0, *wsr1-2*, *wsr2-1*, *wsr3-1*, *wsr4-2*, *irx1-6* (resistance control) and *agb1-1* (susceptibility control) plants were infected with the necrotrophic leaf pathogen isolate *Plectosphaerella cucumerina* BMM (*PcBMM*). The relative fungal biomass was determined 5 days post infection (dpi) by qPCR analysis of the *PcBMM*  $\beta$ -tubulin gene. Bars represent mean values and error bars indicate SD (n= 4-6). Asterisks indicate statistically significant differences to the wild type according to Student's t test (\* $p < 0.05$  ; \*\* $p < 0.01$ ).
